# Supplementary material
Source: PubMed Central journal article supplement (PMC2858924)

**Supplementary  
Figure 1**

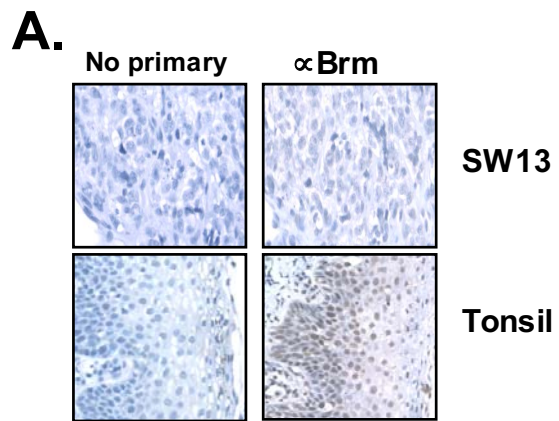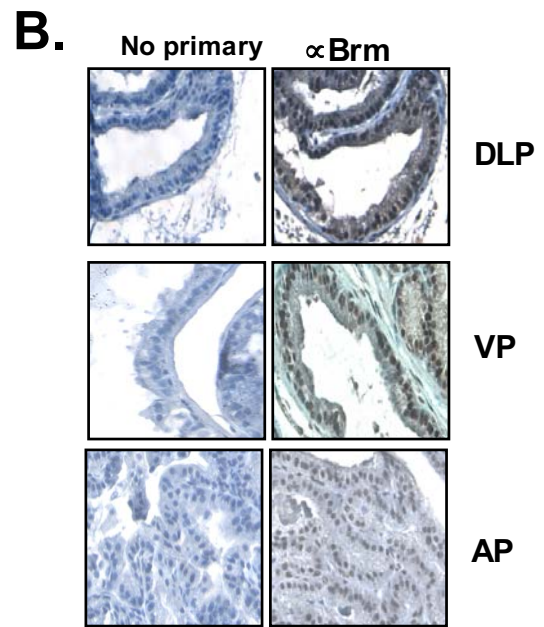

**Supplementary  
Figure 2**

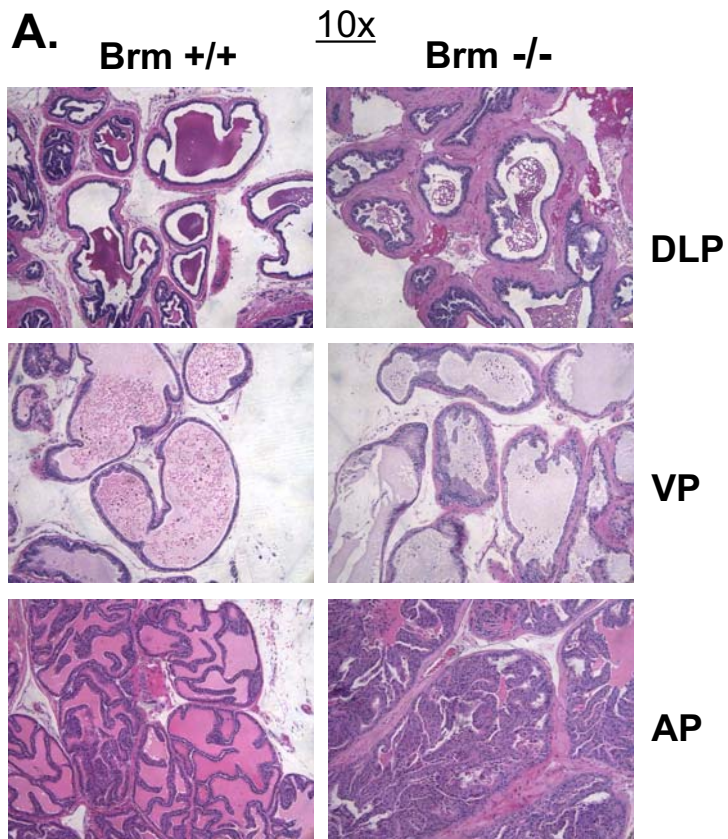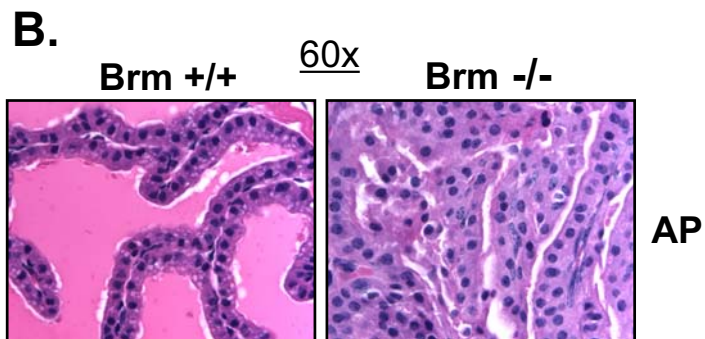

**Supplementary  
Figure 3**

**A.**

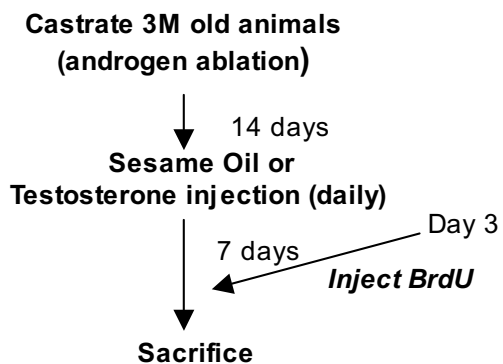

**B.**

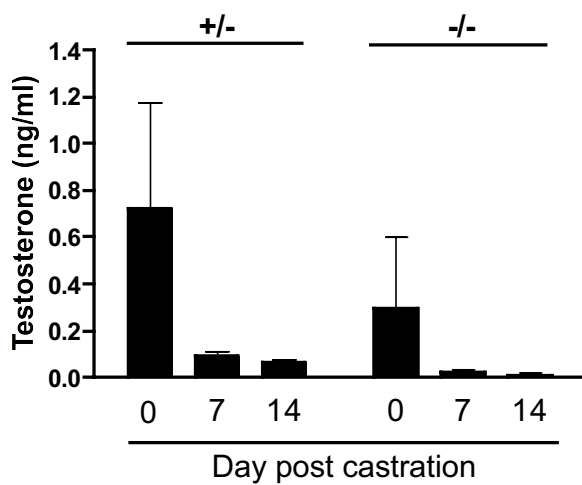

**Supplementary  
Figure 4**

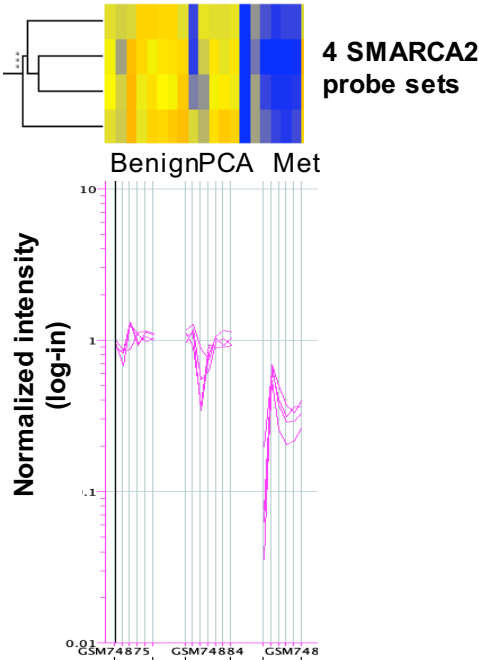

# Supplementary Figure 5

A.

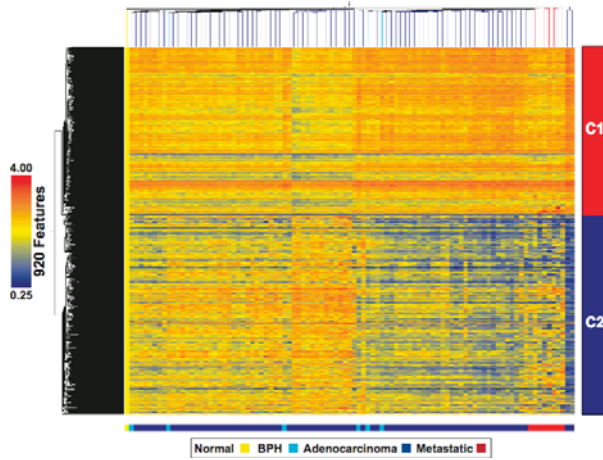

B.

## CORRELATED

| Cell Cycle (p-value = 1.68E-03)                                 |                                                                                                   |                            |
|-----------------------------------------------------------------|---------------------------------------------------------------------------------------------------|----------------------------|
| BUB3                                                            | BUB3 budding uninhibited by benzimidazoles 3 homolog (yeast)                                      | 201456_s_at                |
| CDC23                                                           | CDC23 (cell division cycle 23, yeast, homolog)                                                    | 202892_at                  |
| CDKN1B                                                          | Cyclin-dependent kinase inhibitor 1B (p27, Kip1)                                                  | 209112_at                  |
| ORC4L                                                           | Origin recognition complex, subunit 4-like (yeast)                                                | 203351_s_at                |
| RB1                                                             | Retinoblastoma 1 (including osteosarcoma)                                                         | 203132_at                  |
| SKP1A                                                           | S-phase kinase-associated protein 1A (p19A)                                                       | 200711_s_at<br>200718_s_at |
| SMAD2                                                           | SMAD, mothers against DPP homolog 2 (Drosophila)                                                  | 203075_at<br>203077_s_at   |
| SMAD4                                                           | SMAD, mothers against DPP homolog 4 (Drosophila)                                                  | 202527_s_at                |
| SMC1L1                                                          | SMC1 structural maintenance of chromosomes 1 like 1 (yeast)                                       | 201589_at                  |
| Citrate Cycle (p-value = 1.63E-02)                              |                                                                                                   |                            |
| SDHD                                                            | Succinate dehydrogenase complex, subunit D, integral membrane protein                             | 202026_at                  |
| SUCLA2                                                          | Succinate-CoA ligase, ADP-forming, beta subunit                                                   | 202930_s_at                |
| SUCLG1                                                          | Succinate-CoA ligase, GDP-forming, alpha subunit                                                  | 217874_at                  |
| SUCLG2                                                          | Succinate-CoA ligase, GDP-forming, beta subunit                                                   | 212459_x_at<br>215772_x_at |
| Folate Biosynthesis (p-value = 3.50E-02)                        |                                                                                                   |                            |
| ALS4                                                            | Amyotrophic lateral sclerosis 4                                                                   | 201964_at                  |
| ERCC3                                                           | Excision repair cross-complementing rodent                                                        | 202176_at                  |
| SMARCA2                                                         | SWI/SNF related, matrix associated, actin dependent regulator of chromatin, subfamily a, member 2 | 206542_s_at                |
|                                                                 |                                                                                                   | 212257_s_at                |
|                                                                 |                                                                                                   | 206544_x_at<br>217707_x_at |
| SMARCA5                                                         | SWI/SNF related, matrix associated, actin dependent regulator of chromatin, subfamily a,          | 202303_x_at<br>213859_x_at |
| Secretory Pathway (p-value = 1.04E-04)                          |                                                                                                   |                            |
| ARFGEF2                                                         | ADP-ribosylation factor guanine nucleotide-excha                                                  | 218098_at                  |
| DEK                                                             | DEK oncogene (DNA binding)                                                                        | 200934_at                  |
| EXOC1                                                           | SEC3-like 1 (S. cerevisiae)                                                                       | 222127_s_at                |
| RAB14                                                           | RAB14, member RAS oncogene family                                                                 | 200927_s_at                |
| RAB1A                                                           | RAB1A, member RAS oncogene family                                                                 | 207791_s_at                |
| RAB2                                                            | RAB2, member RAS oncogene family                                                                  | 208731_at                  |
| RAB6C                                                           | RAB6C, member RAS oncogene family                                                                 | 210406_s_at                |
| SCFD1                                                           | Sec1 family domain containing 1                                                                   | 215548_s_at                |
| SEC24B                                                          | SEC24 related gene family, member B (S. cerevis)                                                  | 202798_at                  |
| SRP14                                                           | Signal recognition particle 14kDa (homologous A                                                   | 200007_at                  |
| STX7                                                            | Syntaxin 7                                                                                        | 212631_at<br>212632_at     |
| STXBP3                                                          | Syntaxin binding protein 3                                                                        | 203310_at                  |
| TLOC1                                                           | Translocation protein 1                                                                           | 208943_s_at                |
| TMED10                                                          | Transmembrane trafficking protein                                                                 | 212352_s_at                |
| TRAPPC4                                                         | Trafficking protein particle complex 4                                                            | 217959_s_at                |
| VPS45A                                                          | Vacuolar protein sorting 45A (yeast)                                                              | 209268_at                  |
| Steroid Hormone Receptor Signaling Pathway (p-value = 5.86E-03) |                                                                                                   |                            |
| CRSP2                                                           | Cofactor required for Sp1 transcriptional activation, subunit 2, 150kDa                           | 202610_s_at<br>202611_s_at |
| MED4                                                            | Mediator of RNA polymerase II transcription,                                                      | 217843_s_at                |
| NCOA1                                                           | Nuclear receptor coactivator 1                                                                    | 209105_at<br>209106_at     |
| NCOA6                                                           | Nuclear receptor coactivator 6                                                                    | 208979_at                  |
| RB1                                                             | Retinoblastoma 1 (including osteosarcoma)                                                         | 203132_at                  |
| RNF14                                                           | Ring finger protein 14                                                                            | 201823_s_at<br>201824_at   |
| Ubiquitin Mediated Proteolysis (p-value = 1.32E-02)             |                                                                                                   |                            |
| CDC23                                                           | CDC23 (cell division cycle 23, yeast, homolog)                                                    | 202892_at                  |
| CUL2                                                            | Cullin 2                                                                                          | 203079_s_at                |
| FBXW11                                                          | F-box and WD-40 domain protein 11                                                                 | 209455_at                  |
| HERC2                                                           | D15F37 gene                                                                                       | 217902_s_at                |
| SKP1A                                                           | S-phase kinase-associated protein 1A (p19A)                                                       | 200711_s_at<br>200718_s_at |

## ANTI-CORRELATED

| Antigen Processing and Presentation (p-value = 2.50E-02)     |                                                                              |                            |
|--------------------------------------------------------------|------------------------------------------------------------------------------|----------------------------|
| HLA-DOA                                                      | Major histocompatibility complex, class II, DO alpha                         | 211142_x_at                |
| IFNA4                                                        | Interferon, alpha 4                                                          | 207964_x_at                |
| KIR2DS2                                                      | Killer cell immunoglobulin-like receptor, two                                | 216676_x_at                |
| KIR2DS5                                                      | Killer cell immunoglobulin-like receptor, two                                | 208122_x_at                |
| KIR3DL1                                                      | Killer cell immunoglobulin-like receptor, three                              | 211397_x_at                |
| KIR3DL2                                                      | Killer cell immunoglobulin-like receptor, three                              | 207314_x_at                |
| LTA                                                          | Lymphotoxin alpha (TNF superfamily,                                          | 206975_at                  |
| Neuroactive Ligand-Receptor Interaction (p-value = 1.11E-04) |                                                                              |                            |
| ADRA2B                                                       | Adrenergic, alpha-2B-, receptor                                              | 208544_at                  |
| CCAR1                                                        | Cholecystokinin A receptor                                                   | 211174_s_at                |
| CHRM2                                                        | Cholinergic receptor, muscarinic 2                                           | 221330_at                  |
| CHRM5                                                        | Cholinergic receptor, muscarinic 5                                           | 221347_at                  |
| DRD2                                                         | Dopamine receptor D2                                                         | 216938_x_at                |
| EDG6                                                         | Endothelial differentiation, G-protein-coupled receptor 6                    | 206437_at                  |
| FSHB                                                         | Follicle stimulating hormone, beta polypeptide                               | 214489_at                  |
| GABRA1                                                       | Gamma-aminobutyric acid (GABA) A receptor, alpha 1                           | 206678_at                  |
| GABRD                                                        | Gamma-aminobutyric acid (GABA) A receptor, delta                             | 208457_at                  |
| GABRG2                                                       | Gamma-aminobutyric acid (GABA) A receptor, gamma 2                           | 206849_at                  |
| GABRR2                                                       | Gamma-aminobutyric acid (GABA) receptor, rho 2                               | 208217_at                  |
| GHRHR                                                        | Growth hormone releasing hormone receptor                                    | 211545_at                  |
| GLP1R                                                        | Glucagon-like peptide 1 receptor                                             | 208390_s_at                |
| GLRA1                                                        | Glycine receptor, alpha 1 (startle disease/hyperkplexia, stiff man syndrome) | 207972_at                  |
| GNRH2                                                        | Gonadotropin-releasing hormone 2                                             | 208519_x_at                |
| GPR51                                                        | G protein-coupled receptor 51                                                | 217077_s_at                |
| HRR1                                                         | Histamine receptor H1                                                        | 216738_at                  |
| HTR4                                                         | 5-hydroxytryptamine (serotonin) receptor 4                                   | 207578_s_at<br>216939_s_at |
| HTR6                                                         | 5-hydroxytryptamine (serotonin) receptor 6                                   | 206944_at                  |
| MC2R                                                         | Melanocortin 2 receptor (adrenocorticotrophic hormone)                       | 208568_at                  |
| NPY2R                                                        | Neuropeptide Y receptor Y2                                                   | 210730_s_at                |
| OPRM1                                                        | Opioid receptor, mu 1                                                        | 211359_s_at                |
| C21-Steroid Hormone Metabolism (p-value = 3.60E-03)          |                                                                              |                            |
| CYP11A1                                                      | Cytochrome P450, family 11, subfamily A, polypeptide 1                       | 204309_at                  |
| CYP11B2                                                      | Cytochrome P450, family 11, subfamily B, polypeptide 2                       | 214630_at                  |
| CYP17A1                                                      | Cytochrome P450, family 17, subfamily A, polypeptide 1                       | 205502_at                  |
| CYP21A2                                                      | Cytochrome P450, family 21, subfamily A, polypeptide 2                       | 214622_at                  |

Supplementary  
Figure 5, cont.

C.

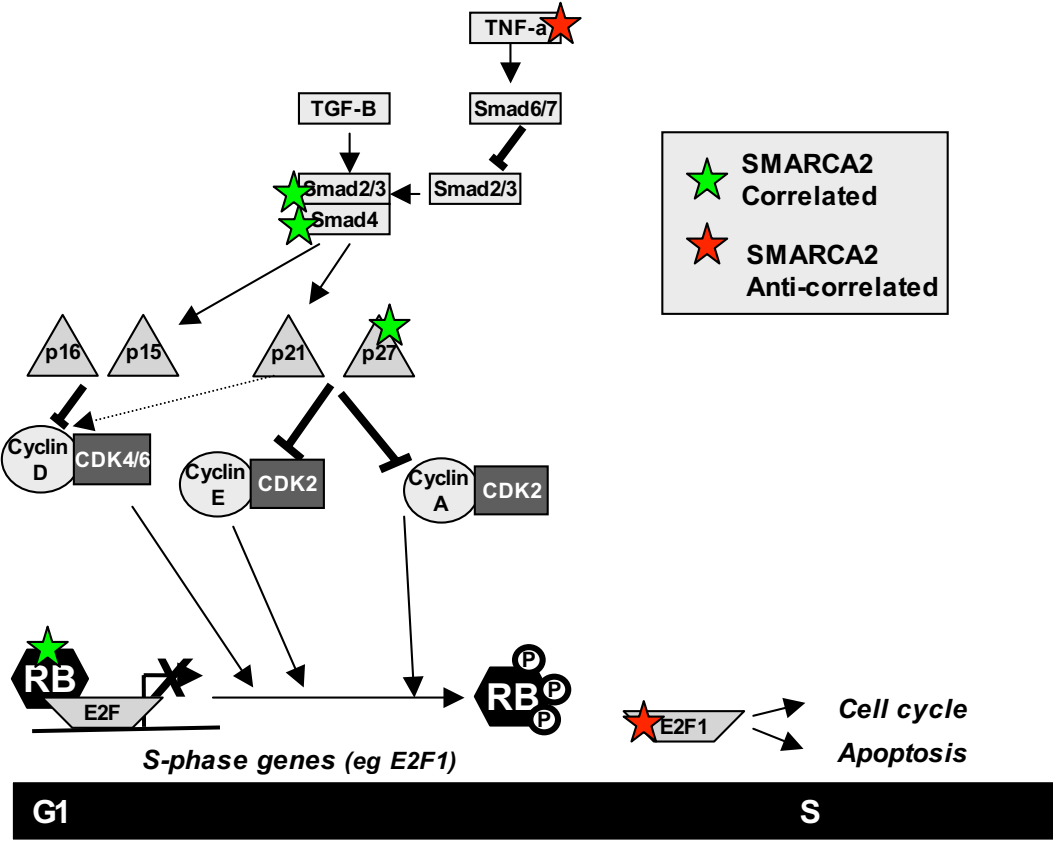

**Supplementary  
Figure 7**

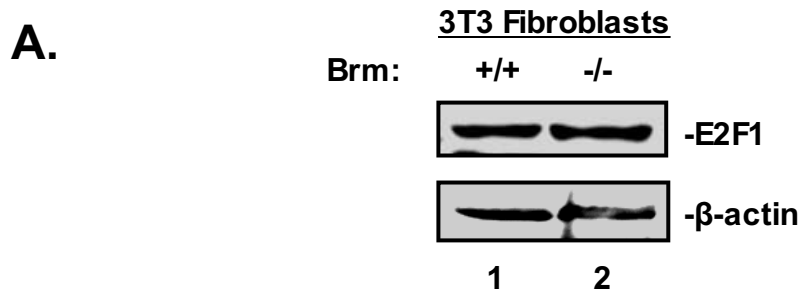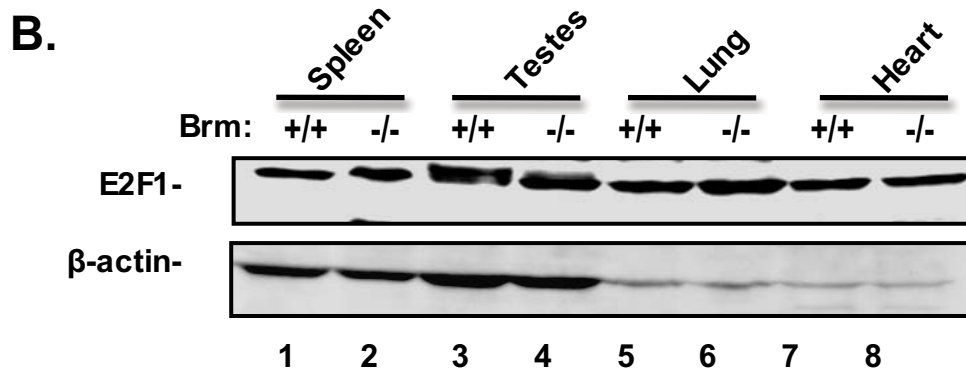

Supplement: NIHMS193569-supplement-Figures_1-5_and_7.pdf [file NIHMS193569-supplement-Figures_1-5_and_7.pdf]
