# Supplementary material
Source: PubMed Central journal article supplement (PMC2858924)
Supplement: NIHMS193569-supplement-Figure_6.pdf [file NIHMS193569-supplement-Figure_6.pdf]

**GENE LIST ANTI-CORRELATED**

| <b>Systematic</b> | <b>Common</b> | <b>Description</b>                                                                                                                                                                                                                                                                                                                                                                                                    |
|-------------------|---------------|-----------------------------------------------------------------------------------------------------------------------------------------------------------------------------------------------------------------------------------------------------------------------------------------------------------------------------------------------------------------------------------------------------------------------|
| 210348_at         |               | 4-Sep Septin 4                                                                                                                                                                                                                                                                                                                                                                                                        |
| 206155_at         | ABCC2         | ATP-binding cassette, sub-family C (CFTR/MRP), member 2                                                                                                                                                                                                                                                                                                                                                               |
| 221226_s_at       | ACCN4         | Amiloride-sensitive cation channel 4, pituitary                                                                                                                                                                                                                                                                                                                                                                       |
| 207427_at         | ACR           | Acrosin                                                                                                                                                                                                                                                                                                                                                                                                               |
| 214957_at         | ACTL8         | Actin-like 8                                                                                                                                                                                                                                                                                                                                                                                                          |
| 207422_at         | ADAM20        | A disintegrin and metalloproteinase domain 20                                                                                                                                                                                                                                                                                                                                                                         |
| 216998_s_at       | ADAM5         | synonym: tMDCII; Homo sapiens a disintegrin and metalloproteinase domain 5 (ADAM5) on chromosome 8.                                                                                                                                                                                                                                                                                                                   |
| 216743_at         | ADCY6         | Adenylate cyclase 6                                                                                                                                                                                                                                                                                                                                                                                                   |
| 206807_s_at       | ADD2          | Adducin 2 (beta)                                                                                                                                                                                                                                                                                                                                                                                                      |
| 208544_at         | ADRA2B        | Adrenergic, alpha-2B-, receptor                                                                                                                                                                                                                                                                                                                                                                                       |
| 38447_at          | ADRBK1        | Adrenergic, beta, receptor kinase 1                                                                                                                                                                                                                                                                                                                                                                                   |
| 219977_at         | AIP1          |                                                                                                                                                                                                                                                                                                                                                                                                                       |
| 211560_s_at       | ALAS2         | Aminolevulinate, delta-, synthase 2 (sideroblastic/hypochromic anemia)                                                                                                                                                                                                                                                                                                                                                |
| 211004_s_at       | ALDH3B1       | Aldehyde dehydrogenase 3 family, member B1                                                                                                                                                                                                                                                                                                                                                                            |
| 204705_x_at       | ALDOB         | Aldolase B, fructose-bisphosphate                                                                                                                                                                                                                                                                                                                                                                                     |
| 220365_at         | ALLC          | Allantoicase                                                                                                                                                                                                                                                                                                                                                                                                          |
| 204664_at         | ALPP          | Alkaline phosphatase, placental (Regan isozyme)                                                                                                                                                                                                                                                                                                                                                                       |
| 216377_x_at       | ALPPL2        | Alkaline phosphatase, placental-like 2                                                                                                                                                                                                                                                                                                                                                                                |
| 221114_at         | AMBN          | Ameloblastin, enamel matrix protein                                                                                                                                                                                                                                                                                                                                                                                   |
| 206892_at         | AMHR2         | Anti-Mullerian hormone receptor, type II                                                                                                                                                                                                                                                                                                                                                                              |
| 217293_at         | ANGPT1        | Angiotensinogen 1                                                                                                                                                                                                                                                                                                                                                                                                     |
| 210952_at         | AP4S1         | Adaptor-related protein complex 4, sigma 1 subunit                                                                                                                                                                                                                                                                                                                                                                    |
| 207158_at         | APOBEC1       | Apolipoprotein B mRNA editing enzyme, catalytic polypeptide 1                                                                                                                                                                                                                                                                                                                                                         |
| 213611_at         | AQP5          | Aquaporin 5                                                                                                                                                                                                                                                                                                                                                                                                           |
| 216219_at         | AQP6          | Aquaporin 6, kidney specific                                                                                                                                                                                                                                                                                                                                                                                          |
| 206784_at         | AQP8          | Aquaporin 8                                                                                                                                                                                                                                                                                                                                                                                                           |
| 214490_at         | ARSF          | Arylsulfatase F                                                                                                                                                                                                                                                                                                                                                                                                       |
| 216204_at         | ARVCF         | Armadillo repeat gene deletes in velocardiofacial syndrome                                                                                                                                                                                                                                                                                                                                                            |
| 214070_s_at       | ATP10B        | ATPase, Class V, type 10B                                                                                                                                                                                                                                                                                                                                                                                             |
| 221240_s_at       | B3GNT4        | UDP-GlcNAc:betaGal beta-1,3-N-acetylglucosaminyltransferase 4                                                                                                                                                                                                                                                                                                                                                         |
| 91920_at          | BCAN          | Brevican                                                                                                                                                                                                                                                                                                                                                                                                              |
| 202094_at         | BIRC5         | Effector cell protease receptor 1                                                                                                                                                                                                                                                                                                                                                                                     |
| 206725_x_at       | BMP1          | Bone morphogenetic protein 1                                                                                                                                                                                                                                                                                                                                                                                          |
| 208292_at         | BMP10         | Bone morphogenetic protein 10                                                                                                                                                                                                                                                                                                                                                                                         |
| 211260_at         | BMP7          | Bone morphogenetic protein 7 (osteogenic protein 1)                                                                                                                                                                                                                                                                                                                                                                   |
| 208331_at         | BPY2          | Basic charge, Y-linked, 2                                                                                                                                                                                                                                                                                                                                                                                             |
| 217207_s_at       | BTNL3         | Butyrophilin-like 3                                                                                                                                                                                                                                                                                                                                                                                                   |
| 220536_at         | C14orf115     | Chromosome 14 open reading frame 115                                                                                                                                                                                                                                                                                                                                                                                  |
| 52741_at          | C14orf172     | Chromosome 14 open reading frame 172                                                                                                                                                                                                                                                                                                                                                                                  |
| 204494_s_at       | C15orf39      | DKFZP434H132 protein                                                                                                                                                                                                                                                                                                                                                                                                  |
| 219420_s_at       | C1orf163      | Chromosome 1 open reading frame 163                                                                                                                                                                                                                                                                                                                                                                                   |
| 220476_s_at       | C1orf183      | Hypothetical protein LOC55924                                                                                                                                                                                                                                                                                                                                                                                         |
| 207482_at         | C20orf10      | Chromosome 20 open reading frame 10                                                                                                                                                                                                                                                                                                                                                                                   |
| 220213_at         | C20orf17      | <small>synonym: C10C10.2_FL2087; ovarian cancer-related protein; gp_component; nuclear [gnid 000504] [evidence EA]; gp_function: zinc ion binding [gnid 000270] [evidence EA]; gp_function: transcription factor activity [gnid 000370] [evidence EA]; gp_process: regulation of transcription, DNA-dependent [gnid 000302] [evidence EA]; Homo sapiens chromosome 20 open reading frame 17 (C20orf17), mRNA.</small> |
| 217622_at         | C22orf3       | Chromosome 22 open reading frame 3                                                                                                                                                                                                                                                                                                                                                                                    |
| 220831_at         | C2GNT3        | Core 2 beta-1,6-N-acetylglucosaminyltransferase 3                                                                                                                                                                                                                                                                                                                                                                     |
| 205331_s_at       | C5orf19       | Chromosome 5 open reading frame 19                                                                                                                                                                                                                                                                                                                                                                                    |
| 221100_at         | C6orf15       | Chromosome 6 open reading frame 15                                                                                                                                                                                                                                                                                                                                                                                    |

|             |          |                                                                                              |
|-------------|----------|----------------------------------------------------------------------------------------------|
| 201974_s_at | C7orf28A | Chromosome 7 open reading frame 28A                                                          |
| 204509_at   | CA12     | synonyms: CAXII, FLJ20151, HsT18816; isoform 1 precursor is encoded by transcript variant 1; |
| 207504_at   | CA7      | Carbonic anhydrase VII                                                                       |
| 205199_at   | CA9      | Carbonic anhydrase IX                                                                        |
| 206384_at   | CACNG3   | Calcium channel, voltage-dependent, gamma subunit 3                                          |
| 205428_s_at | CALB2    | Calbindin 2, 29kDa (calretinin)                                                              |
| 216143_at   | CALML4   | Calmodulin-like 4                                                                            |
| 213108_at   | CAMK2A   | Calcium/calmodulin-dependent protein kinase (CaM kinase) II alpha                            |
| 34846_at    | CAMK2B   | Calcium/calmodulin-dependent protein kinase (CaM kinase) II beta                             |
| 219365_s_at | CAMKV    | CaM kinase-like vesicle-associated                                                           |
| 206607_at   | CBL      | Cas-Br-M (murine) ecotropic retroviral transforming sequence                                 |
| 206257_at   | CCDC9    | Coiled-coil domain containing 9                                                              |
| 211174_s_at | CCKAR    | Cholecystokinin A receptor                                                                   |
| 207354_at   | CCL16    | Chemokine (C-C motif) ligand 16                                                              |
| 204826_at   | CCNF     | Cyclin F                                                                                     |
| 219273_at   | CCNK     | Chromosome 14 open reading frame 65                                                          |
| 206967_at   | CCNT1    | Cyclin T1                                                                                    |
| 220671_at   | CCRN4L   | CCR4 carbon catabolite repression 4-like (S. cerevisiae)                                     |
| 38521_at    | CD22     | CD22 antigen                                                                                 |
| 206280_at   | CDH18    | Cadherin 18, type 2                                                                          |
| 204996_s_at | CDK5R1   | Cyclin-dependent kinase 5, regulatory subunit 1 (p35)                                        |
| 210789_x_at | CEACAM3  | Carcinoembryonic antigen-related cell adhesion molecule 3                                    |
| 208052_x_at | CEACAM3  | Carcinoembryonic antigen-related cell adhesion molecule 3                                    |
| 210821_x_at | CENPA    | Centromere protein A, 17kDa                                                                  |
| 221330_at   | CHRM2    | Cholinergic receptor, muscarinic 2                                                           |
| 221347_at   | CHRM5    | Cholinergic receptor, muscarinic 5                                                           |
| 210221_at   | CHRNA3   | Cholinergic receptor, nicotinic, alpha polypeptide 3                                         |
| 207024_at   | CHRND    | Cholinergic receptor, nicotinic, delta polypeptide                                           |
| 216015_s_at | CIAS1    | Cold autoinflammatory syndrome 1                                                             |
| 219500_at   | CLCF1    | Cardiotrophin-like cytokine factor 1                                                         |
| 208437_at   | CLCN1    | Chloride channel 1, skeletal muscle (Thomsen disease, autosomal dominant)                    |
| 207047_s_at | CLCNKA   | Chloride channel Ka                                                                          |
| 220304_s_at | CNGB3    | Cyclic nucleotide gated channel beta 3                                                       |
| 206970_at   | CNTN2    | Contactin 2 (axonal)                                                                         |
| 216993_s_at | COL11A2  | Collagen, type XI, alpha 2                                                                   |
| 216904_at   | COL6A1   | Collagen, type VI, alpha 1                                                                   |
| 204644_at   | COVA1    | Cytosolic ovarian carcinoma antigen 1                                                        |
| 219707_at   | CPNE7    | Copine VII                                                                                   |
| 201638_s_at | CPSF1    | Cleavage and polyadenylation specific factor 1, 160kDa                                       |
| 216423_at   | CRSP7    | Cofactor required for Sp1 transcriptional activation, subunit 7, 70kDa                       |
| 207715_at   | CRYGB    | Crystallin, gamma B                                                                          |
| 210228_at   | CSF2     | Colony stimulating factor 2 (granulocyte-macrophage)                                         |
| 221407_at   | CX36     | Connexin-36                                                                                  |
| 204309_at   | CYP11A1  | Cytochrome P450, family 11, subfamily A, polypeptide 1                                       |
| 214630_at   | CYP11B2  | Cytochrome P450, family 11, subfamily B, polypeptide 2                                       |
| 205502_at   | CYP17A1  | Cytochrome P450, family 17, subfamily A, polypeptide 1                                       |
| 214622_at   | CYP21A2  | Cytochrome P450, family 21, subfamily A, polypeptide 2                                       |
| 214320_x_at | CYP2A6   | Cytochrome P450, family 2, subfamily A, polypeptide 6                                        |
| 207244_x_at | CYP2A6   | Cytochrome P450, family 2, subfamily A, polypeptide 6                                        |
| 216661_x_at | CYP2C9   | Cytochrome P450, family 2, subfamily C, polypeptide 9                                        |
| 215809_at   | CYP2D6   | Cytochrome P450, family 2, subfamily D, polypeptide 6                                        |

|             |              |                                                                                 |
|-------------|--------------|---------------------------------------------------------------------------------|
| 205998_x_at | CYP3A4       | Cytochrome P450, family 3, subfamily A, polypeptide 4                           |
| 206878_at   | DAO          | D-amino-acid oxidase                                                            |
| 216725_at   | DCAMKL2      | Doublecortin and CaM kinase-like 2                                              |
| 216512_s_at | DCT          | Dopachrome tautomerase (dopachrome delta-isomerase, tyrosine-related protein 2) |
| 214788_x_at | DDN          | Dendrin                                                                         |
| 220732_at   | DEPDC2       | DEP domain containing 2                                                         |
| 216285_at   | DGCR14       | DiGeorge syndrome critical region gene 13                                       |
| 215003_at   | DGCR9        | DiGeorge syndrome critical region gene 9                                        |
| 215541_s_at | DIAPH1       | Diaphanous homolog 1 (Drosophila)                                               |
| 216608_at   | DKFZP434A062 | DKFZP434A062 protein                                                            |
| 208216_at   | DLX4         | Distal-less homeobox 4                                                          |
| 217341_at   | DNM1         | Dynamin 1                                                                       |
| 216024_at   | DNM2         | Dynamin 2                                                                       |
| 206531_at   | DPF1         | D4, zinc and double PHD fingers family 1                                        |
| 219651_at   | DPPA4        | Developmental pluripotency associated 4                                         |
| 214301_s_at | DPYSL4       | Dihydropyrimidinase-like 4                                                      |
| 216938_x_at | DRD2         | Dopamine receptor D2                                                            |
| 211484_s_at | DSCAM        | Down syndrome cell adhesion molecule                                            |
| 222022_at   | DTX3         | Deltex 3 homolog (Drosophila)                                                   |
| 2028_s_at   | E2F1         | E2F transcription factor 1                                                      |
| 204947_at   | E2F1         | E2F transcription factor 1                                                      |
| 202248_at   | E2F4         | E2F transcription factor 4, p107/p130-binding                                   |
| 216667_at   | ECRP         | Human ECRP gene for eosinophil cationic related protein.                        |
| 206437_at   | EDG6         | Endothelial differentiation, G-protein-coupled receptor 6                       |
| 214345_at   | EDIL3        | EGF-like repeats and discoidin I-like domains 3                                 |
| 215866_at   | EEF1G        | Eukaryotic translation elongation factor 1 gamma                                |
| 210883_x_at | EFNB3        | Ephrin-B3                                                                       |
| 207767_s_at | EGR4         | Early growth response 4                                                         |
| 210724_at   | EMR3         | Egf-like module containing, mucin-like, hormone receptor-like 3                 |
| 214627_at   | EPX          | Eosinophil peroxidase                                                           |
| 214372_x_at | ERN2         | Endoplasmic reticulum to nucleus signalling 2                                   |
| 204817_at   | ESPL1        | Extra spindle poles like 1 (S. cerevisiae)                                      |
| 214480_at   | ETV3         | Ets variant gene 3                                                              |
| 216172_at   | EXOSC2       | Exosome component 2                                                             |
| 205030_at   | FABP7        | Fatty acid binding protein 7, brain                                             |
| 211333_s_at | FASLG        | Fas ligand (TNF superfamily, member 6)                                          |
| 207835_at   | FBLN1        | Fibulin 1                                                                       |
| 222352_at   | FBXO31       | F-box protein 31                                                                |
| 205650_s_at | FGA          | Fibrinogen alpha chain                                                          |
| 204988_at   | FGB          | Fibrinogen beta chain                                                           |
| 208240_s_at | FGF1         | Fibroblast growth factor 1 (acidic)                                             |
| 221166_at   | FGF23        | Fibroblast growth factor 23                                                     |
| 216455_at   | FLJ00049     | FLJ00049 protein                                                                |
| 216460_at   | FLJ00049     | FLJ00049 protein                                                                |
| 219331_s_at | FLJ10748     | Hypothetical protein FLJ10748                                                   |
| 221180_at   | FLJ23074     | Yeast Sps1/Ste20-related kinase 4 (S. cerevisiae)                               |
| 216791_at   | FLJ33318     | Hypothetical protein FLJ33318                                                   |
| 216507_at   | FLJ90013     | Hypothetical protein FLJ90013                                                   |
| 210414_at   | FLRT1        | Fibronectin leucine rich transmembrane protein 1                                |
| 204437_s_at | FOLR1        | Folate receptor 1 (adult)                                                       |
| 210103_s_at | FOXA2        | Forkhead box A2                                                                 |

|             |           |                                                                                          |
|-------------|-----------|------------------------------------------------------------------------------------------|
| 215381_at   | FRAP1     | FK506 binding protein 12-rapamycin associated protein 1                                  |
| 214489_at   | FSHB      | Follicle stimulating hormone, beta polypeptide                                           |
| 207590_s_at | FSHPRH1   | FSH primary response (LRPR1 homolog, rat) 1                                              |
| 208505_s_at | FUT2      | Fucosyltransferase 2 (secretor status included)                                          |
| 214088_s_at | FUT3      | Fucosyltransferase 3 (galactoside 3(4)-L-fucosyltransferase, Lewis blood group included) |
| 221453_at   | G6PC2     | Glucose-6-phosphatase, catalytic, 2                                                      |
| 206678_at   | GABRA1    | Gamma-aminobutyric acid (GABA) A receptor, alpha 1                                       |
| 208457_at   | GABRD     | Gamma-aminobutyric acid (GABA) A receptor, delta                                         |
| 206849_at   | GABRG2    | Gamma-aminobutyric acid (GABA) A receptor, gamma 2                                       |
| 208217_at   | GABRR2    | Gamma-aminobutyric acid (GABA) receptor, rho 2                                           |
| 206269_at   | GCM1      | Glial cells missing homolog 1 (Drosophila)                                               |
| 206614_at   | GDF5      | Growth differentiation factor 5 (cartilage-derived morphogenetic protein-1)              |
| 211545_at   | GHRHR     | Growth hormone releasing hormone receptor                                                |
| 208489_at   | GJA8      | Gap junction protein, alpha 8, 50kDa (connexin 50)                                       |
| 216446_at   | GLIS1     | GLIS family zinc finger 1                                                                |
| 208390_s_at | GLP1R     | Glucagon-like peptide 1 receptor                                                         |
| 207972_at   | GLRA1     | Glycine receptor, alpha 1 (startle disease/hyperekplexia, stiff man syndrome)            |
| 222109_at   | GNL3L     | Guanine nucleotide binding protein-like 3 (nucleolar)-like                               |
| 208519_x_at | GNRH2     | Gonadotropin-releasing hormone 2                                                         |
| 214558_at   | GPR12     | Hypothetical protein LOC283535                                                           |
| 221294_at   | GPR21     | G protein-coupled receptor 21                                                            |
| 214613_at   | GPR3      | G protein-coupled receptor 3                                                             |
| 208556_at   | GPR31     | G protein-coupled receptor 31                                                            |
| 217077_s_at | GPR51     | G protein-coupled receptor 51                                                            |
| 220481_at   | GPR75     | G protein-coupled receptor 75                                                            |
| 211821_x_at | GYPA      | Glycophorin A (includes MN blood group)                                                  |
| 216736_at   | HAPLN4    | Hyaluronan and proteoglycan link protein 4                                               |
| 221380_at   | HHCM      | Similar to flagelliform silk protein                                                     |
| 207611_at   | HIST1H2BL | Histone 1, H2bl                                                                          |
| 222305_at   | HK2       | Hexokinase 2                                                                             |
| 211142_x_at | HLA-DOA   | Major histocompatibility complex, class II, DO alpha                                     |
| 205601_s_at | HOXB5     | Homeo box B5                                                                             |
| 216760_at   | HRASLS2   | HRAS-like suppressor 2                                                                   |
| 216738_at   | HRH1      | Histamine receptor H1                                                                    |
| 207020_at   | HSF2BP    | Heat shock transcription factor 2 binding protein                                        |
| 220763_at   | HSPA12A   | Heat shock 70kDa protein 12A                                                             |
| 220747_at   | HSPC072   | HSPC072 protein                                                                          |
| 216939_s_at | HTR4      | 5-hydroxytryptamine (serotonin) receptor 4                                               |
| 207578_s_at | HTR4      | 5-hydroxytryptamine (serotonin) receptor 4                                               |
| 206944_at   | HTR6      | 5-hydroxytryptamine (serotonin) receptor 6                                               |
| 220249_at   | HYAL4     | Hyaluronoglucosaminidase 4                                                               |
| 213450_s_at | ICOSLG    | Inducible T-cell co-stimulator ligand                                                    |
| 207964_x_at | IFNA4     | Interferon, alpha 4                                                                      |
| 217469_at   | IGHD      | Immunoglobulin heavy constant delta                                                      |
| 204549_at   | IKBKE     | Inhibitor of kappa light polypeptide gene enhancer in B-cells, kinase epsilon            |
| 206926_s_at | IL11      | Interleukin 11                                                                           |
| 219323_s_at | IL18BP    | Interleukin 18 binding protein                                                           |
| 221404_at   | IL1F6     | Interleukin 1 family, member 6 (epsilon)                                                 |
| 212659_s_at | IL1RN     | Interleukin 1 receptor antagonist                                                        |
| 207252_at   | INE1      | Inactivation escape 1                                                                    |
| 216986_s_at | IRF4      | Interferon regulatory factor 4                                                           |

|             |           |                                                                                                                                                                                                          |
|-------------|-----------|----------------------------------------------------------------------------------------------------------------------------------------------------------------------------------------------------------|
| 214599_at   | IVL       | Involucrin                                                                                                                                                                                               |
| 203904_x_at | KAI1      | CD82 antigen                                                                                                                                                                                             |
| 206078_at   | KALRN     | Kalirin, RhoGEF kinase                                                                                                                                                                                   |
| 206692_at   | KCNJ10    | Potassium inwardly-rectifying channel, subfamily J, member 10                                                                                                                                            |
| 208359_s_at | KCNJ4     | Potassium inwardly-rectifying channel, subfamily J, member 4                                                                                                                                             |
| 220727_at   | KCNK10    | Potassium channel, subfamily K, member 10                                                                                                                                                                |
| 219883_at   | KCNK4     | Potassium channel, subfamily K, member 4                                                                                                                                                                 |
| 222281_s_at | KCTD7     | Potassium channel tetramerisation domain containing 7                                                                                                                                                    |
| 221948_s_at | KELCHL    | Kelch-like 22 (Drosophila)                                                                                                                                                                               |
| 204371_s_at | KHSRP     | KH-type splicing regulatory protein (FUSE binding protein 2)                                                                                                                                             |
| 215480_at   | KIAA0509  | KIAA0509 protein                                                                                                                                                                                         |
| 207637_at   | KIAA0789  | KIAA0789 gene product                                                                                                                                                                                    |
| 213636_at   | KIAA1045  | KIAA1045                                                                                                                                                                                                 |
| 221863_at   | KIAA1193  | KIAA1193                                                                                                                                                                                                 |
| 208122_x_at | KIR2DS5   | Killer cell immunoglobulin-like receptor, two domains, short cytoplasmic tail, 3                                                                                                                         |
| 211397_x_at | KIR3DL1   | Killer cell immunoglobulin-like receptor, three domains, long cytoplasmic tail, 1                                                                                                                        |
| 207314_x_at | KIR3DL2   | Killer cell immunoglobulin-like receptor, three domains, long cytoplasmic tail, 2                                                                                                                        |
| 216404_at   | KLHL1AS   | Kelch-like 1 antisense (Drosophila)                                                                                                                                                                      |
| 205307_s_at | KMO       | Kynurenine 3-monooxygenase (kynurenine 3-hydroxylase)                                                                                                                                                    |
| 214399_s_at | KRT4      | Keratin 4                                                                                                                                                                                                |
| 207670_at   | KRTHB5    | Keratin, hair, basic, 5                                                                                                                                                                                  |
| 213770_at   | KSR       | Kinase suppressor of ras                                                                                                                                                                                 |
| 211652_s_at | LBP       | Lipopolysaccharide binding protein                                                                                                                                                                       |
| 217005_at   | LDLR      | Low density lipoprotein receptor (familial hypercholesterolemia)                                                                                                                                         |
| 210313_at   | LILRA4    | Leukocyte immunoglobulin-like receptor, subfamily A (with TM domain), member 4                                                                                                                           |
| 210660_at   | LILRB1    | Leukocyte immunoglobulin-like receptor, subfamily B (with TM and ITIM domains), member 1                                                                                                                 |
| 211133_x_at | LILRB3    | Leukocyte immunoglobulin-like receptor, subfamily B (with TM and ITIM domains), member 3                                                                                                                 |
| 210225_x_at | LILRB3    | Leukocyte immunoglobulin-like receptor, subfamily B (with TM and ITIM domains), member 3                                                                                                                 |
| 210784_x_at | LILRB3    | Leukocyte immunoglobulin-like receptor, subfamily B (with TM and ITIM domains), member 3                                                                                                                 |
| 211135_x_at | LILRB3    | Leukocyte immunoglobulin-like receptor, subfamily B (with TM and ITIM domains), member 3                                                                                                                 |
| 206606_at   | LIPC      | Lipase, hepatic                                                                                                                                                                                          |
| 214839_at   | LOC157627 | Hypothetical protein LOC157627                                                                                                                                                                           |
| 210822_at   | LOC283345 | Derived by automated computational analysis using gene prediction method: GNOMON. Supporting evidence includes similarity to: 2 mRNAs; PREDICTED: Homo sapiens RPL13-2 pseudogene (LOC283345), misc RNA. |
| 51226_at    | LOC389677 | Similar to RIKEN cDNA 3000004N20                                                                                                                                                                         |
| 221929_at   | LOC389677 | Similar to RIKEN cDNA 3000004N20                                                                                                                                                                         |
| 215756_at   | LOC440708 | Hypothetical gene supported by AK024293                                                                                                                                                                  |
| 216118_at   | LOC441091 | PREDICTED: Homo sapiens hypothetical gene supported by AK022427 (LOC441091), mRNA                                                                                                                        |
| 215202_at   | LOC91316  | Homo sapiens cDNA FLJ43820 fis, clone TEST14002202, moderately similar to Lambda L-chain C region.                                                                                                       |
| 206975_at   | LTA       | Lymphotoxin alpha (TNF superfamily, member 1)                                                                                                                                                            |
| 222107_x_at | LZTS1     | Leucine zipper, putative tumor suppressor 1                                                                                                                                                              |
| 210295_at   | MAGEA10   | Melanoma antigen family A, 10                                                                                                                                                                            |
| 215932_at   | MAGEC2    | Melanoma antigen family C, 2                                                                                                                                                                             |
| 215384_s_at | MAP1A     | Microtubule-associated protein 1A                                                                                                                                                                        |
| 205813_s_at | MAT1A     | Methionine adenosyltransferase I, alpha                                                                                                                                                                  |
| 208568_at   | MC2R      | Melanocortin 2 receptor (adrenocorticotrophic hormone)                                                                                                                                                   |
| 210795_s_at | MEG3      | Maternally expressed 3                                                                                                                                                                                   |
| 221150_at   | MEPE      | Matrix, extracellular phosphoglycoprotein with ASARM motif (bone)                                                                                                                                        |
| 213783_at   | MFNG      | Manic fringe homolog (Drosophila)                                                                                                                                                                        |
| 215197_at   | MGAT5     | Mannosyl (alpha-1,6-)-glycoprotein beta-1,6-N-acetyl-glucosaminyltransferase                                                                                                                             |
| 204574_s_at | MMP19     |                                                                                                                                                                                                          |
| 216362_at   | MOZ/CBP   | type II; Homo sapiens partial mRNA for MOZ/CBP chimeric transcript type II.                                                                                                                              |

|             |          |                                                                                                 |
|-------------|----------|-------------------------------------------------------------------------------------------------|
| 221390_s_at | MTMR8    | Myotubularin related protein 8                                                                  |
| 201710_at   | MYBL2    | V-myb myeloblastosis viral oncogene homolog (avian)-like 2                                      |
| 208208_at   | MYH13    | Myosin, heavy polypeptide 13, skeletal muscle                                                   |
| 205144_at   | MYL5     | Myosin, light polypeptide 5, regulatory                                                         |
| 215822_x_at | MYT1     | Myelin transcription factor 1                                                                   |
| 220514_at   | NAP1L4   | Nucleosome assembly protein 1-like 4                                                            |
| 215857_at   | NCLN     | Homo sapiens cDNA FLJ12247 fis, clone MAMMA1001397.                                             |
| 208196_x_at | NFATC1   | Nuclear factor of activated T-cells, cytoplasmic, calcineurin-dependent 1                       |
| 214628_at   | NHLH1    | Nescient helix loop helix 1                                                                     |
| 204239_s_at | NNAT     | Neuronatin                                                                                      |
| 207217_s_at | NOX1     | NADPH oxidase 1                                                                                 |
| 220641_at   | NOX5     | Sperm equatorial segment protein 1                                                              |
| 206285_at   | NPHP1    | Nephronophthisis 1 (juvenile)                                                                   |
| 209957_s_at | NPPA     | Natriuretic peptide precursor A                                                                 |
| 210730_s_at | NPY2R    | Neuropeptide Y receptor Y2                                                                      |
| 206410_at   | NROB2    | Nuclear receptor subfamily 0, group B, member 2                                                 |
| 207742_s_at | NR6A1    | Nuclear receptor subfamily 6, group A, member 1                                                 |
| 215818_at   | NUDT7    | Nudix (nucleoside diphosphate linked moiety X)-type motif 7                                     |
| 211166_at   | NY-REN-7 | NY-REN-7 antigen                                                                                |
| 211359_s_at | OPRM1    | Opioid receptor, mu 1                                                                           |
| 221464_at   | OR1D2    | Olfactory receptor, family 1, subfamily D, member 2                                             |
| 221426_s_at | OR3A3    | Olfactory receptor, family 3, subfamily A, member 3                                             |
| 208507_at   | OR7C2    | Olfactory receptor, family 7, subfamily C, member 2                                             |
| 221237_s_at | OSBP2    | Oxysterol binding protein 2                                                                     |
| 206605_at   | P11      | 26 serine protease                                                                              |
| 216668_at   | PABPC1   | Poly(A) binding protein, cytoplasmic 1                                                          |
| 220962_s_at | PADI1    | Peptidyl arginine deiminase, type I                                                             |
| 220001_at   | PADI4    | Peptidyl arginine deiminase, type IV                                                            |
| 219160_s_at | PAPOLG   | Poly(A) polymerase gamma                                                                        |
| 211176_s_at | PAX4     | Paired box gene 4                                                                               |
| 206802_at   | PAX5     | Paired box gene 5 (B-cell lineage specific activator)                                           |
| 216761_at   | PDCD8    | Programmed cell death 8 (apoptosis-inducing factor)                                             |
| 206623_at   | PDE6A    | Phosphodiesterase 6A, cGMP-specific, rod, alpha                                                 |
| 210060_at   | PDE6G    | Phosphodiesterase 6G, cGMP-specific, rod, gamma                                                 |
| 216055_at   | PDGFB    | Platelet-derived growth factor beta polypeptide (simian sarcoma viral (v-sis) oncogene homolog) |
| 216061_x_at | PDGFB    | Platelet-derived growth factor beta polypeptide (simian sarcoma viral (v-sis) oncogene homolog) |
| 32029_at    | PDPK1    | 3-phosphoinositide dependent protein kinase-1                                                   |
| 206380_s_at | PFC      | Properdin P factor, complement                                                                  |
| 203470_s_at | PLEK     | Pleckstrin                                                                                      |
| 215899_at   | PNAS-4   | Chromosome 1 open reading frame 121                                                             |
| 211660_at   | POU2F2   | POU domain, class 2, transcription factor 2                                                     |
| 220082_at   | PPP1R14D | Protein phosphatase 1, regulatory (inhibitor) subunit 14D                                       |
| 220714_at   | PRDM14   | PR domain containing 14                                                                         |
| 220928_s_at | PRDM16   | PR domain containing 16                                                                         |
| 214565_s_at | PROL5    | Submaxillary gland androgen regulated protein 3 homolog A (mouse)                               |
| 211223_at   | PROP1    | Prophet of Pit1, paired-like homeodomain transcription factor                                   |
| 217269_s_at | PRSS7    | Protease, serine, 7 (enterokinase)                                                              |
| 220024_s_at | PRX      | Periaxin                                                                                        |
| 208332_at   | PRY      | PTPN13-like, Y-linked                                                                           |
| 211521_s_at | PSCD4    | Pleckstrin homology, Sec7 and coiled-coil domains 4                                             |
| 220635_at   | PSORS1C2 | Psoriasis susceptibility 1 candidate 2                                                          |

|             |         |                                                                                                                  |
|-------------|---------|------------------------------------------------------------------------------------------------------------------|
| 215492_x_at | PTCRA   | Pre T-cell antigen receptor alpha                                                                                |
| 208408_at   | PTN     | Pleiotrophin (heparin binding growth factor 8, neurite growth-promoting factor 1)                                |
| 211845_at   | PVRL1   | Hypothetical protein MGC16207                                                                                    |
| 219579_at   | RAB3IL1 | RAB3A interacting protein (rabin3)-like 1                                                                        |
| 216842_x_at | RBM     | YRRM; Human RNA binding motif (RBM) gene, partial cds.                                                           |
| 221377_s_at | RBPSUHL | Recombining binding protein suppressor of hairless (Drosophila)-like                                             |
| 203899_s_at | RCP9    | Calcitonin gene-related peptide-receptor component protein                                                       |
| 207070_at   | RGR     | Retinal G protein coupled receptor                                                                               |
| 206455_s_at | RHO     | Rhodopsin (opsin 2, rod pigment) (retinitis pigmentosa 4, autosomal dominant)                                    |
| 220439_at   | RIN3    | Ras and Rab interactor 3                                                                                         |
| 206196_s_at | RPIP8   | RaP2 interacting protein 8                                                                                       |
| 217723_x_at | RPS12   | Ribosomal protein S12                                                                                            |
| 201205_at   | RRBP1   | Ribosome binding protein 1 homolog 180kDa (dog)                                                                  |
| 220965_s_at | RSHL1   | Radial spokehead-like 1                                                                                          |
| 217263_x_at | RUNX1   | Runt-related transcription factor 1 (acute myeloid leukemia 1; aml1 oncogene)                                    |
| 211181_x_at | RUNX1   | Runt-related transcription factor 1 (acute myeloid leukemia 1; aml1 oncogene)                                    |
| 221282_x_at | RUNX2   | Runt-related transcription factor 2                                                                              |
| 218406_x_at | SCIRP10 | SCIRP10-related protein                                                                                          |
| 206381_at   | SCN2A2  | Sodium channel, voltage-gated, type II, alpha 2                                                                  |
| 206981_at   | SCN4A   | Sodium channel, voltage-gated, type IV, alpha                                                                    |
| 211157_at   | SEMA4F  | Sema domain, immunoglobulin domain (Ig), transmembrane domain (TM) and short cytoplasmic domain, (semaphorin) 4F |
| 220778_x_at | SEMA6B  | Sema domain, transmembrane domain (TM), and cytoplasmic domain, (semaphorin) 6B                                  |
| 216537_s_at | SIGLEC7 | Sialic acid binding Ig-like lectin 7                                                                             |
| 217159_x_at | SIGLEC7 | Sialic acid binding Ig-like lectin 7                                                                             |
| 205484_at   | SIT1    | Signaling threshold regulating transmembrane adaptor 1                                                           |
| 208409_at   | SLC14A2 | Solute carrier family 14 (urea transporter), member 2                                                            |
| 213522_s_at | SLC16A3 | Solute carrier family 16 (monocarboxylic acid transporters), member 3                                            |
| 208389_s_at | SLC1A2  | Solute carrier family 1 (glial high affinity glutamate transporter), member 2                                    |
| 210923_at   | SLC1A7  | Solute carrier family 1 (glutamate transporter), member 7                                                        |
| 220867_s_at | SLC24A2 | Solute carrier family 24 (sodium/potassium/calcium exchanger), member 2                                          |
| 207560_at   | SLC28A1 | Solute carrier family 28 (sodium-coupled nucleoside transporter), member 1                                       |
| 207184_at   | SLC6A13 | Solute carrier family 6 (neurotransmitter transporter, GABA), member 13                                          |
| 220868_s_at | SLC7A10 | Solute carrier family 7, (neutral amino acid transporter, y+ system) member 10                                   |
| 219480_at   | SNAI1   | Snail homolog 1 (Drosophila)                                                                                     |
| 213337_s_at | SOCS1   | Suppressor of cytokine signaling 1                                                                               |
| 214015_at   | SOCS7   | Suppressor of cytokine signaling 7                                                                               |
| 209843_s_at | SOX10   | SRY (sex determining region Y)-box 10                                                                            |
| 214178_s_at | SOX2    | SRY (sex determining region Y)-box 2                                                                             |
| 208468_at   | SOX21   | SRY (sex determining region Y)-box 21                                                                            |
| 220217_x_at | SPANXC  | SPANX family, member C                                                                                           |
| 213442_x_at | SPDEF   | SAM pointed domain containing ets transcription factor                                                           |
| 208416_s_at | SPTB    | Spectrin, beta, erythrocytic (includes spherocytosis, clinical type I)                                           |
| 220067_at   | SPTBN5  | Spectrin, beta, non-erythrocytic 5                                                                               |
| 211670_x_at | SSX3    | Synovial sarcoma, X breakpoint 3                                                                                 |
| 207601_at   | SULT1B1 | Sulfotransferase family, cytosolic, 1B, member 1                                                                 |
| 215865_at   | SYT12   | Synaptotagmin XII                                                                                                |
| 217433_at   | TACC1   | Transforming, acidic coiled-coil containing protein 1                                                            |
| 221324_at   | TAS2R1  | Taste receptor, type 2, member 1                                                                                 |
| 221444_at   | TAS2R16 | Taste receptor, type 2, member 16                                                                                |
| 207684_at   | TBX6    | T-box 6                                                                                                          |
| 207894_s_at | TCL6    | T-cell leukemia/lymphoma 6                                                                                       |

|             |          |                                                                                                                                                                                                                                                            |
|-------------|----------|------------------------------------------------------------------------------------------------------------------------------------------------------------------------------------------------------------------------------------------------------------|
| 221624_at   | TCL6     | T-cell leukemia/lymphoma 6                                                                                                                                                                                                                                 |
| 207503_at   | TCP10    | T-complex 10 (mouse)                                                                                                                                                                                                                                       |
| 221034_s_at | TEX13B   | Testis expressed sequence 13B                                                                                                                                                                                                                              |
| 221448_s_at | TEX15    | Testis expressed sequence 15                                                                                                                                                                                                                               |
| 214064_at   | TF       | Transferrin                                                                                                                                                                                                                                                |
| 203673_at   | TG       | Thyroglobulin                                                                                                                                                                                                                                              |
| 207446_at   | TLR6     | Toll-like receptor 6                                                                                                                                                                                                                                       |
| 207179_at   | TLX1     | T-cell leukemia, homeobox 1                                                                                                                                                                                                                                |
| 206242_at   | TM4SF5   | Transmembrane 4 L six family member 5                                                                                                                                                                                                                      |
| 220111_s_at | TMEM16B  | Transmembrane protein 16B                                                                                                                                                                                                                                  |
| 207113_s_at | TNF      | Tumor necrosis factor (TNF superfamily, member 2)                                                                                                                                                                                                          |
| 202509_s_at | TNFAIP2  | Tumor necrosis factor, alpha-induced protein 2                                                                                                                                                                                                             |
| 207216_at   | TNFSF8   | Tumor necrosis factor (ligand) superfamily, member 8                                                                                                                                                                                                       |
| 219434_at   | TREM1    | Triggering receptor expressed on myeloid cells 1                                                                                                                                                                                                           |
| 217381_s_at | TRGV5    | H.sapiens gene for T cell receptor gamma V region 5.                                                                                                                                                                                                       |
| 204649_at   | TROAP    | Trophinin associated protein (tastin)                                                                                                                                                                                                                      |
| 217160_at   | TSPY1    | Testis specific protein, Y-linked 1                                                                                                                                                                                                                        |
| 217261_at   | TTY2     | synonym: TTY2; Homo sapiens testis-specific transcript, Y-linked 2 (TTY2) on chromosome Y.                                                                                                                                                                 |
| 215042_at   | TXNDC5   | Thioredoxin domain containing 5                                                                                                                                                                                                                            |
| 206630_at   | TYR      | Tyrosinase (oculocutaneous albinism IA)                                                                                                                                                                                                                    |
| 207862_at   | UPK2     | Uroplakin 2                                                                                                                                                                                                                                                |
| 211184_s_at | USH1C    | Usher syndrome 1C (autosomal recessive, severe)                                                                                                                                                                                                            |
| 220895_at   | USP29    | Ubiquitin specific protease 29                                                                                                                                                                                                                             |
| 213692_s_at | VDR      | Vitamin D (1,25- dihydroxyvitamin D3) receptor                                                                                                                                                                                                             |
| 204253_s_at | VDR      | Vitamin D (1,25- dihydroxyvitamin D3) receptor                                                                                                                                                                                                             |
| 216726_at   | VENTX2P1 | VENT-like homeobox 2 pseudogene 1                                                                                                                                                                                                                          |
| 206213_at   | WNT10B   | Wingless-type MMTV integration site family, member 10B                                                                                                                                                                                                     |
| 207612_at   | WNT8B    | Wingless-type MMTV integration site family, member 8B                                                                                                                                                                                                      |
| 206484_s_at | XPNPEP2  | X-prolyl aminopeptidase (aminopeptidase P) 2, membrane-bound                                                                                                                                                                                               |
| 211393_at   | ZNF278   | Zinc finger protein 278                                                                                                                                                                                                                                    |
| 216453_at   | ZNF287   | Zinc finger protein 287                                                                                                                                                                                                                                    |
| 215701_at   | ZNF291   | Zinc finger protein 291                                                                                                                                                                                                                                    |
| 78330_at    | ZNF335   | Zinc finger protein 335                                                                                                                                                                                                                                    |
| 213841_at   |          | Homo sapiens, clone IMAGE:4915189, mRNA                                                                                                                                                                                                                    |
| 217244_at   |          | <small>match: proteins: P25491 P31689 P42824 P42825 P43644 P54102 Q03363 Q04960 Q42530 Q43177; Human DNA sequence from clone RP1-124O9 on chromosome 6q21 Contains an HSJ2 (heat shock protein, DNAJ-like 2 (HDJ2)) pseudogene, complete sequence.</small> |
| 221130_s_at |          |                                                                                                                                                                                                                                                            |
| 216429_at   |          | Homo sapiens mRNA, chromosome 1 specific transcript KIAA0486.                                                                                                                                                                                              |
| 217453_at   |          | MRNA; cDNA DKFZp434E2028 (from clone DKFZp434E2028)                                                                                                                                                                                                        |
| 220902_at   |          |                                                                                                                                                                                                                                                            |
| 216240_at   |          |                                                                                                                                                                                                                                                            |
| 220767_at   |          |                                                                                                                                                                                                                                                            |
| 220752_at   |          |                                                                                                                                                                                                                                                            |
| 216499_at   |          | MRNA; cDNA DKFZp434K0610 (from clone DKFZp434K0610)                                                                                                                                                                                                        |
| 220879_at   |          |                                                                                                                                                                                                                                                            |
| 220612_at   |          |                                                                                                                                                                                                                                                            |
| 207743_at   |          |                                                                                                                                                                                                                                                            |
| 216448_at   |          | Homo sapiens cDNA FLJ12624 fis, clone NT2RM4001754.                                                                                                                                                                                                        |
| 217439_at   |          | MRNA; cDNA DKFZp434L098 (from clone DKFZp434L098)                                                                                                                                                                                                          |
| 215762_at   |          | Homo sapiens cDNA clone IMAGE:4818531.                                                                                                                                                                                                                     |
| 221179_at   |          |                                                                                                                                                                                                                                                            |
| 217082_at   |          | Unknown protein                                                                                                                                                                                                                                            |



|             |                                                            |
|-------------|------------------------------------------------------------|
| 216546_s_at |                                                            |
| 221155_x_at |                                                            |
| 214896_at   | MRNA full length insert cDNA clone EUROIMAGE 29222         |
| 207882_at   |                                                            |
| 216676_x_at |                                                            |
| 216597_at   | T-cell receptor V beta gene segment V-beta-6, clone IGRb11 |
| 220263_at   |                                                            |
| 220698_at   |                                                            |
| 220871_at   |                                                            |
| 222072_at   | MRNA; cDNA DKFZp686J1229 (from clone DKFZp686J1229)        |
| 215896_at   | CDNA FLJ10062 fis, clone HEMBA1001415                      |
| 208007_at   |                                                            |
| 216107_at   | PP13                                                       |
| 221109_at   |                                                            |
| 221159_at   |                                                            |
| 216789_at   | CDNA: FLJ22786 fis, clone KAIA2150                         |
| 221099_at   |                                                            |

#### CORRELATED GENES

| Systematic  | Common   | Description                                                                          |
|-------------|----------|--------------------------------------------------------------------------------------|
| 202653_s_at |          | 7-Mar Membrane-associated ring finger (C3HC4) 7                                      |
| 202654_x_at |          | Membrane-associated ring finger (C3HC4) 7                                            |
| 200015_s_at |          | Septin 2                                                                             |
| 200778_s_at |          | Septin 2                                                                             |
| 212698_s_at |          | Septin 10                                                                            |
| 214720_x_at |          | Septin 10                                                                            |
| 202169_s_at | AASDHPPT | Aminoadipate-semialdehyde dehydrogenase-phosphopantetheinyl transferase              |
| 209027_s_at | ABI1     | Abl-interactor 1                                                                     |
| 222230_s_at | ACTR10   | Actin-related protein 10 homolog (S. cerevisiae)                                     |
| 200996_at   | ACTR3    | ARP3 actin-related protein 3 homolog (yeast)                                         |
| 213102_at   | ACTR3    | ARP3 actin-related protein 3 homolog (yeast)                                         |
| 203935_at   | ACVR1    | Activin A receptor, type I                                                           |
| 221761_at   | ADSS     | Adenylosuccinate synthase                                                            |
| 218534_s_at | AGGF1    | Angiogenic factor with G patch and FHA domains 1                                     |
| 203156_at   | AKAP11   | A kinase (PRKA) anchor protein 11                                                    |
| 202125_s_at | ALS2CR3  | Amyotrophic lateral sclerosis 2 (juvenile) chromosome region, candidate 3            |
| 201964_at   | ALS4     | Amyotrophic lateral sclerosis 4                                                      |
| 218167_at   | AMZ2     |                                                                                      |
| 221825_at   | ANGEL2   | Similar to RIKEN cDNA 2610307I21                                                     |
| 208773_s_at | ANKHD1   | Ankyrin repeat and KH domain containing 1                                            |
| 212798_s_at | ANKMY2   | Ankyrin repeat and MYND domain containing 2                                          |
| 213005_s_at | ANKRD15  | Ankyrin repeat domain 15                                                             |
| 212211_at   | ANKRD17  | Ankyrin repeat domain 17                                                             |
| 201366_at   | ANXA7    | Annexin A7                                                                           |
| 209860_s_at | ANXA7    | Annexin A7                                                                           |
| 203525_s_at | APC      | Adenomatosis polyposis coli                                                          |
| 202630_at   | APPBP2   | Amyloid beta precursor protein (cytoplasmic tail) binding protein 2                  |
| 218098_at   | ARFGEF2  | ADP-ribosylation factor guanine nucleotide-exchange factor 2 (brefeldin A-inhibited) |

|             |           |                                                                                                                |
|-------------|-----------|----------------------------------------------------------------------------------------------------------------|
| 218230_at   | ARFIP1    | ADP-ribosylation factor interacting protein 1 (arfaptin 1)                                                     |
| 203910_at   | ARHGAP29  | Rho GTPase activating protein 29                                                                               |
| 217936_at   | ARHGAP5   | synonyms: p190-B, RhoGAP5; isoform a is encoded by transcript variant 1;                                       |
| 221230_s_at | ARID4B    | AT rich interactive domain 4B (RBP1- like)                                                                     |
| 203486_s_at | ARMC8     | Armadillo repeat containing 8                                                                                  |
| 201855_s_at | ASCIZ     | ATM/ATR-Substrate Chk2-Interacting Zn2+-finger protein                                                         |
| 222103_at   | ATF1      | Activating transcription factor 1                                                                              |
| 221492_s_at | ATG3      | APG3 autophagy 3-like (S. cerevisiae)                                                                          |
| 200818_at   | ATP5O     | ATP synthase, H+ transporting, mitochondrial F1 complex, O subunit (oligomycin sensitivity conferring protein) |
| 201443_s_at | ATP6AP2   | ATPase, H+ transporting, lysosomal accessory protein 2                                                         |
| 201444_s_at | ATP6AP2   | ATPase, H+ transporting, lysosomal accessory protein 2                                                         |
| 200096_s_at | ATP6V0E   | ATPase, H+ transporting, lysosomal 9kDa, V0 subunit e                                                          |
| 208860_s_at | ATRX      | Alpha thalassemia/mental retardation syndrome X-linked (RAD54 homolog, S. cerevisiae)                          |
| 208861_s_at | ATRX      | Alpha thalassemia/mental retardation syndrome X-linked (RAD54 homolog, S. cerevisiae)                          |
| 203232_s_at | ATXN1     | Ataxin 1                                                                                                       |
| 203080_s_at | BAZ2B     | Bromodomain adjacent to zinc finger domain, 2B                                                                 |
| 201084_s_at | BCLAF1    | Acetyl-CoA carboxylase, biotin carboxylase subunit (CAC2)                                                      |
| 215440_s_at | BEXL1     | Brain expressed X-linked-like 1                                                                                |
| 218090_s_at | BRWD2     | Bromodomain and WD repeat domain containing 2                                                                  |
| 202946_s_at | BTBD3     | BTB (POZ) domain containing 3                                                                                  |
| 201456_s_at | BUB3      | BUB3 budding uninhibited by benzimidazoles 3 homolog (yeast)                                                   |
| 218331_s_at | C10orf18  | Chromosome 10 open reading frame 18                                                                            |
| 211376_s_at | C10orf86  | Chromosome 10 open reading frame 86                                                                            |
| 219067_s_at | C10orf86  | Chromosome 10 open reading frame 86                                                                            |
| 213239_at   | C13orf24  | Chromosome 13 open reading frame 24                                                                            |
| 218139_s_at | C14orf108 | Chromosome 14 open reading frame 108                                                                           |
| 202623_at   | C14orf11  | Chromosome 14 open reading frame 11                                                                            |
| 212870_at   | C14orf138 | Chromosome 14 open reading frame 138                                                                           |
| 209092_s_at | C17orf25  | Chromosome 17 open reading frame 25                                                                            |
| 220992_s_at | C1orf25   | Chromosome 1 open reading frame 25                                                                             |
| 220477_s_at | C20orf30  | Chromosome 20 open reading frame 30                                                                            |
| 221787_at   | C6orf120  | synonym: bA160E12.4; Homo sapiens chromosome 6 open reading frame 120 (C6orf120), mRNA.                        |
| 218195_at   | C6orf211  | Chromosome 6 open reading frame 211                                                                            |
| 218877_s_at | C6orf75   | Chromosome 6 open reading frame 75                                                                             |
| 205684_s_at | C9orf55   | Chromosome 9 open reading frame 55                                                                             |
| 203801_at   | CACYBP    | Calcyclin binding protein                                                                                      |
| 212711_at   | CAMSAP1   | Calmodulin regulated spectrin-associated protein 1                                                             |
| 207483_s_at | CAND1     | Cullin-associated and neddylation-dissociated 1                                                                |
| 213165_at   | CAP350    | Centrosome-associated protein 350                                                                              |
| 203356_at   | CAPN7     | Calpain 7                                                                                                      |
| 203357_s_at | CAPN7     | Calpain 7                                                                                                      |
| 201238_s_at | CAPZA2    | Capping protein (actin filament) muscle Z-line, alpha 2                                                        |
| 207467_x_at | CAST      | Calpastatin                                                                                                    |
| 212586_at   | CAST      | Calpastatin                                                                                                    |
| 201518_at   | CBX1      | Chromobox homolog 1 (HP1 beta homolog Drosophila )                                                             |
| 200984_s_at | CD59      | CD59 antigen p18-20 (antigen identified by monoclonal antibodies 16.3A5, EJ16, EJ30, EL32 and G344)            |
| 221449_s_at | CDA08     | T-cell immunomodulatory protein                                                                                |
| 202892_at   | CDC23     | CDC23 (cell division cycle 23, yeast, homolog)                                                                 |
| 209112_at   | CDKN1B    | Cyclin-dependent kinase inhibitor 1B (p27, Kip1)                                                               |
| 204739_at   | CENPC1    | Centromere protein C 1                                                                                         |
| 209662_at   | CETN3     | Centrin, EF-hand protein, 3 (CDC31 homolog, yeast)                                                             |

|             |               |                                                                                                                                     |
|-------------|---------------|-------------------------------------------------------------------------------------------------------------------------------------|
| 218085_at   | CHMP5         | Chromatin modifying protein 5                                                                                                       |
| 219356_s_at | CHMP5         | Chromatin modifying protein 5                                                                                                       |
| 218439_s_at | COMM10        | COMM domain containing 10                                                                                                           |
| 202467_s_at | COPS2         | COP9 constitutive photomorphogenic homolog subunit 2 (Arabidopsis)                                                                  |
| 218042_at   | COPS4         | COP9 constitutive photomorphogenic homolog subunit 4 (Arabidopsis)                                                                  |
| 202143_s_at | COPS8         | COP9 constitutive photomorphogenic homolog subunit 8 (Arabidopsis)                                                                  |
| 201200_at   | CREG1         | Cellular repressor of E1A-stimulated genes 1                                                                                        |
| 208669_s_at | CRI1          | CREBBP/EP300 inhibitor 1                                                                                                            |
| 208670_s_at | CRI1          | CREBBP/EP300 inhibitor 1                                                                                                            |
| 220044_x_at | CROP          | Cisplatin resistance-associated overexpressed protein                                                                               |
| 202610_s_at | CRSP2         | Cofactor required for Sp1 transcriptional activation, subunit 2, 150kDa                                                             |
| 202611_s_at | CRSP2         | Cofactor required for Sp1 transcriptional activation, subunit 2, 150kDa                                                             |
| 204350_s_at | CRSP9         | Cofactor required for Sp1 transcriptional activation, subunit 9, 33kDa                                                              |
| 219767_s_at | CRYZL1        | Crystallin, zeta (quinone reductase)-like 1                                                                                         |
| 201111_at   | CSE1L         | CSE1 chromosome segregation 1-like (yeast)                                                                                          |
| 209259_s_at | CSPG6         | Chondroitin sulfate proteoglycan 6 (bamacan)                                                                                        |
| 202521_at   | CTCF          | CCCTC-binding factor (zinc finger protein)                                                                                          |
| 200764_s_at | CTNNA1        | Catenin (cadherin-associated protein), alpha 1, 102kDa                                                                              |
| 200765_x_at | CTNNA1        | Catenin (cadherin-associated protein), alpha 1, 102kDa                                                                              |
| 210844_x_at | CTNNA1        | Catenin (cadherin-associated protein), alpha 1, 102kDa                                                                              |
| 203079_s_at | CUL2          | Cullin 2                                                                                                                            |
| 201423_s_at | CUL4A         | Cullin 4A                                                                                                                           |
| 202213_s_at | CUL4B         | Cullin 4B                                                                                                                           |
| 202214_s_at | CUL4B         | Cullin 4B                                                                                                                           |
| 203531_at   | CUL5          | Cullin 5                                                                                                                            |
| 200794_x_at | DAZAP2        | DAZ associated protein 2                                                                                                            |
| 212919_at   | DCP2          | DCP2 decapping enzyme homolog (S. cerevisiae)                                                                                       |
| 218013_x_at | DCTN4         | Dynactin 4 (p62)                                                                                                                    |
| 201241_at   | DDX1          | DEAD (Asp-Glu-Ala-Asp) box polypeptide 1                                                                                            |
| 202462_s_at | DDX46         | DEAD (Asp-Glu-Ala-Asp) box polypeptide 46                                                                                           |
| 200934_at   | DEK           | DEK oncogene (DNA binding)                                                                                                          |
| 218102_at   | DERA          | 2-deoxyribose-5-phosphate aldolase homolog (C. elegans)                                                                             |
| 212648_at   | DHX29         | DEAH (Asp-Glu-Ala-His) box polypeptide 29                                                                                           |
| 201581_at   | DJ971N18.2    | Hypothetical protein DJ971N18.2                                                                                                     |
| 202560_s_at | DKFZP547E1010 | Chromosome 1 open reading frame 77                                                                                                  |
| 221596_s_at | DKFZP564O0523 | Hypothetical protein DKFZp564O0523                                                                                                  |
| 202514_at   | DLG1          | Discs, large homolog 1 (Drosophila)                                                                                                 |
| 202116_at   | DPF2          | D4, zinc and double PHD fingers family 2                                                                                            |
| 202673_at   | DPM1          | Dolichyl-phosphate mannosyltransferase polypeptide 1, catalytic subunit                                                             |
| 209572_s_at | EED           | Embryonic ectoderm development                                                                                                      |
| 221528_s_at | ELMO2         | Engulfment and cell motility 2 (ced-12 homolog, C. elegans)                                                                         |
| 55692_at    | ELMO2         | Engulfment and cell motility 2 (ced-12 homolog, C. elegans)                                                                         |
| 201769_at   | ENTH          | Enthoprotin                                                                                                                         |
| 202176_at   | ERCC3         | Excision repair cross-complementing rodent repair deficiency, complementation group 3 (xeroderma pigmentosum group B complementing) |
| 222127_s_at | EXOC1         | SEC3-like 1 (S. cerevisiae)                                                                                                         |
| 212131_at   | FAM61A        | Family with sequence similarity 61, member A                                                                                        |
| 212132_at   | FAM61A        | Family with sequence similarity 61, member A                                                                                        |
| 209004_s_at | FBXL5         | F-box and leucine-rich repeat protein 5                                                                                             |
| 222119_s_at | FBXO11        | F-box protein 11                                                                                                                    |
| 202271_at   | FBXO28        | F-box protein 28                                                                                                                    |
| 218432_at   | FBXO3         | F-box protein 3                                                                                                                     |

|             |          |                                                                                                                         |
|-------------|----------|-------------------------------------------------------------------------------------------------------------------------|
| 209455_at   | FBXW11   | F-box and WD-40 domain protein 11                                                                                       |
| 209630_s_at | FBXW2    | F-box and WD-40 domain protein 2                                                                                        |
| 212367_at   | FEM1B    | Fem-1 homolog b (C. elegans)                                                                                            |
| 212373_at   | FEM1B    | Fem-1 homolog b (C. elegans)                                                                                            |
| 213341_at   | FEM1C    | Fem-1 homolog c (C.elegans)                                                                                             |
| 202302_s_at | FLJ11021 | Similar to splicing factor, arginine/serine-rich 4                                                                      |
| 218449_at   | FLJ11200 | Hypothetical protein FLJ11200                                                                                           |
| 218179_s_at | FLJ12716 | FLJ12716 protein                                                                                                        |
| 212482_at   | FLJ13910 | Hypothetical protein FLJ13910                                                                                           |
| 219467_at   | FLJ20125 | Hypothetical protein FLJ20125                                                                                           |
| 219858_s_at | FLJ20160 | FLJ20160 protein                                                                                                        |
| 222209_s_at | FLJ22104 | Hypothetical protein FLJ22104                                                                                           |
| 213294_at   | FLJ38348 | Hypothetical protein FLJ38348                                                                                           |
| 203689_s_at | FMR1     | Fragile X mental retardation 1                                                                                          |
| 215245_x_at | FMR1     | Fragile X mental retardation 1                                                                                          |
| 209702_at   | FTO      | Fatso                                                                                                                   |
| 218373_at   | FTS      | Fused toes homolog (mouse)                                                                                              |
| 204299_at   | FUSIP1   | FUS interacting protein (serine/arginine-rich) 1                                                                        |
| 203282_at   | GBE1     | Glucan (1,4-alpha-), branching enzyme 1 (glycogen branching enzyme, Andersen disease, glycogen storage disease type IV) |
| 217990_at   | GMPR2    | Guanosine monophosphate reductase 2                                                                                     |
| 202615_at   | GNAQ     | Guanine nucleotide binding protein (G protein), q polypeptide                                                           |
| 212243_at   | GRINL1A  | Glutamate receptor, ionotropic, N-methyl D-aspartate-like 1A                                                            |
| 212244_at   | GRINL1A  | Glutamate receptor, ionotropic, N-methyl D-aspartate-like 1A                                                            |
| 213357_at   | GTF2H5   | General transcription factor IIH, polypeptide 5                                                                         |
| 218343_s_at | GTF3C3   | General transcription factor IIIC, polypeptide 3, 102kDa                                                                |
| 201554_x_at | GYG1     | Glycogenin                                                                                                              |
| 212205_at   | H2AFV    | H2A histone family, member V                                                                                            |
| 212206_s_at | H2AFV    | H2A histone family, member V                                                                                            |
| 203138_at   | HAT1     |                                                                                                                         |
| 209274_s_at | HBLD2    | HESB like domain containing 2                                                                                           |
| 212785_s_at | HDCMA18P | HDCMA18P protein                                                                                                        |
| 217902_s_at | HERC2    | D15F37 gene                                                                                                             |
| 203711_s_at | HIBCH    | 3-hydroxyisobutyryl-Coenzyme A hydrolase                                                                                |
| 212293_at   | HIPK1    | Homeodomain interacting protein kinase 1                                                                                |
| 218946_at   | HIRIP5   | HIRA interacting protein 5                                                                                              |
| 218152_at   | HMG20A   | High-mobility group 20A                                                                                                 |
| 209786_at   | HMGN4    | High mobility group nucleosomal binding domain 4                                                                        |
| 204112_s_at | HNMT     | Histamine N-methyltransferase                                                                                           |
| 211929_at   | HNRPA3   | Heterogeneous nuclear ribonucleoprotein A3                                                                              |
| 201132_at   | HNRPH2   |                                                                                                                         |
| 208990_s_at | HNRPH3   | Heterogeneous nuclear ribonucleoprotein H3 (2H9)                                                                        |
| 209512_at   | HSDL2    | Hydroxysteroid dehydrogenase like 2                                                                                     |
| 221622_s_at | HT007    | Uncharacterized hypothalamus protein HT007                                                                              |
| 202602_s_at | HTATSF1  | HIV TAT specific factor 1                                                                                               |
| 203327_at   | IDE      | Insulin-degrading enzyme                                                                                                |
| 212223_at   | IDS      | Iduronate 2-sulfatase (Hunter syndrome)                                                                                 |
| 202491_s_at | IKBKAP   | Inhibitor of kappa light polypeptide gene enhancer in B-cells, kinase complex-associated protein                        |
| 209566_at   | INSIG2   | Insulin induced gene 2                                                                                                  |
| 217908_s_at | IQWD1    | IQ motif and WD repeats 1                                                                                               |
| 209907_s_at | ITSN2    | Intersectin 2                                                                                                           |
| 201643_x_at | JMJD1B   | Jumonji domain containing 1B                                                                                            |

|             |           |                                                                            |
|-------------|-----------|----------------------------------------------------------------------------|
| 210878_s_at | JMJD1B    | Jumonji domain containing 1B                                               |
| 212357_at   | KIAA0280  | KIAA0280 protein                                                           |
| 203288_at   | KIAA0355  | KIAA0355                                                                   |
| 212428_at   | KIAA0368  | KIAA0368                                                                   |
| 203048_s_at | KIAA0372  | KIAA0372                                                                   |
| 203049_s_at | KIAA0372  | KIAA0372                                                                   |
| 212215_at   | KIAA0436  | Prolyl endopeptidase-like                                                  |
| 201778_s_at | KIAA0494  | KIAA0494 gene product                                                      |
| 212402_at   | KIAA0853  | KIAA0853                                                                   |
| 212325_at   | KIAA1102  | KIAA1102 protein                                                           |
| 212779_at   | KIAA1109  | KIAA1109                                                                   |
| 221736_at   | KIAA1219  | KIAA1219 protein                                                           |
| 212453_at   | KIAA1279  | KIAA1279                                                                   |
| 212163_at   | KIDINS220 | Kinase D-interacting substance of 220 kDa                                  |
| 203333_at   | KIFAP3    | Kinesin-associated protein 3                                               |
| 217906_at   | KLHDC2    | Kelch domain containing 2                                                  |
| 34031_i_at  | KRIT1     | KRIT1, ankyrin repeat containing                                           |
| 214709_s_at | KTN1      | Kinectin 1 (kinesin receptor)                                              |
| 202020_s_at | LANCL1    | LanC lantibiotic synthetase component C-like 1 (bacterial)                 |
| 200673_at   | LAPTM4A   | Lysosomal-associated protein transmembrane 4 alpha                         |
| 202377_at   | LEPR      | Leptin receptor                                                            |
| 201595_s_at | LEREPO4   | Likely ortholog of mouse immediate early response, erythropoietin 4        |
| 202386_s_at | LKAP      | Limkain b1                                                                 |
| 218191_s_at | LMBRD1    | LMBR1 domain containing 1                                                  |
| 218303_x_at | LOC51315  | Hypothetical protein LOC51315                                              |
| 220770_s_at | LOC63920  | Homo sapiens transposon-derived Buster3 transposase-like (LOC63920), mRNA. |
| 212833_at   | LOC91137  | Hypothetical protein BC017169                                              |
| 213220_at   | LOC92482  | Hypothetical protein LOC92482                                              |
| 207358_x_at | MACF1     | Glycine-rich protein (GRP3S)                                               |
| 212184_s_at | MAP3K7IP2 | Mitogen-activated protein kinase kinase kinase 7 interacting protein 2     |
| 218311_at   | MAP4K3    | Mitogen-activated protein kinase kinase kinase kinase 3                    |
| 203553_s_at | MAP4K5    | Mitogen-activated protein kinase kinase kinase kinase 5                    |
| 203218_at   | MAPK9     | Mitogen-activated protein kinase 9                                         |
| 200624_s_at | MATR3     | Matrin 3                                                                   |
| 200626_s_at | MATR3     | Matrin 3                                                                   |
| 214363_s_at | MATR3     | Matrin 3                                                                   |
| 209580_s_at | MBD4      | Methyl-CpG binding domain protein 4                                        |
| 214047_s_at | MBD4      | Methyl-CpG binding domain protein 4                                        |
| 218288_s_at | MDS025    | Hypothetical protein MDS025                                                |
| 202616_s_at | MECP2     | Methyl CpG binding protein 2 (Rett syndrome)                               |
| 217843_s_at | MED4      | Mediator of RNA polymerase II transcription, subunit 4 homolog (yeast)     |
| 221570_s_at | METTL5    | Methyltransferase like 5                                                   |
| 213065_at   | MGC23401  | Hypothetical protein MGC23401                                              |
| 218138_at   | MKKS      | McKusick-Kaufman syndrome                                                  |
| 218259_at   | MKL2      | MKL/myocardin-like 2                                                       |
| 202520_s_at | MLH1      | MutL homolog 1, colon cancer, nonpolyposis type 2 (E. coli)                |
| 218212_s_at | MOCS2     | Molybdenum cofactor synthesis 2                                            |
| 221381_s_at | MORF4     | Mortality factor 4                                                         |
| 217982_s_at | MORF4L1   | Mortality factor 4 like 1                                                  |
| 212199_at   | MRFAP1L1  | Morf4 family associated protein 1-like 1                                   |
| 218536_at   | MRS2L     | MRS2-like, magnesium homeostasis factor (S. cerevisiae)                    |

|             |          |                                                                                  |
|-------------|----------|----------------------------------------------------------------------------------|
| 218716_x_at | MTO1     | Mitochondrial translation optimization 1 homolog (S. cerevisiae)                 |
| 208047_s_at | NAB1     | NGFI-A binding protein 1 (EGR1 binding protein 1)                                |
| 219368_at   | NAP1L2   | Nucleosome assembly protein 1-like 2                                             |
| 201384_s_at | NBR1     | Neighbor of BRCA1 gene 1                                                         |
| 207738_s_at | NCKAP1   | NCK-associated protein 1                                                         |
| 209105_at   | NCOA1    | Nuclear receptor coactivator 1                                                   |
| 209106_at   | NCOA1    | Nuclear receptor coactivator 1                                                   |
| 208979_at   | NCOA6    | Nuclear receptor coactivator 6                                                   |
| 200854_at   | NCOR1    | Nuclear receptor co-repressor 1                                                  |
| 200857_s_at | NCOR1    | Nuclear receptor co-repressor 1                                                  |
| 217800_s_at | NDFIP1   | Nedd4 family interacting protein 1                                               |
| 210817_s_at | NDP52    | Nuclear domain 10 protein                                                        |
| 203613_s_at | NDUFB6   | NADH dehydrogenase (ubiquinone) 1 beta subcomplex, 6, 17kDa                      |
| 212530_at   | NEK7     | NIMA (never in mitosis gene a)-related kinase 7                                  |
| 212678_at   | NF1      | Neurofibromin 1 (neurofibromatosis, von Recklinghausen disease, Watson disease)  |
| 218127_at   | NFYB     | Nuclear transcription factor Y, beta                                             |
| 218129_s_at | NFYB     | Nuclear transcription factor Y, beta                                             |
| 202215_s_at | NFYC     | Nuclear transcription factor Y, gamma                                            |
| 219353_at   | NHLRC2   | synonyms: FLJ20147, FLJ25621, FLJ33312, MGC45492, DKFZp779F115; 1200003G01Rik;   |
| 209075_s_at | NIFUN    | NifU-like N-terminal domain containing                                           |
| 202783_at   | NNT      | Nicotinamide nucleotide transhydrogenase                                         |
| 202784_s_at | NNT      | Nicotinamide nucleotide transhydrogenase                                         |
| 210097_s_at | NOL7     | Nucleolar protein 7, 27kDa                                                       |
| 213838_at   | NOL7     | Nucleolar protein 7, 27kDa                                                       |
| 201455_s_at | NPEPPS   | Aminopeptidase puromycin sensitive                                               |
| 220248_x_at | NSFL1C   | NSFL1 (p97) cofactor (p47)                                                       |
| 213461_at   | NUDT21   | Nudix (nucleoside diphosphate linked moiety X)-type motif 21                     |
| 209073_s_at | NUMB     | Numb homolog (Drosophila)                                                        |
| 202184_s_at | NUP133   | Nucleoporin 133kDa                                                               |
| 203351_s_at | ORC4L    | Origin recognition complex, subunit 4-like (yeast)                               |
| 209485_s_at | OSBPL1A  | Oxysterol binding protein-like 1A                                                |
| 212585_at   | OSBPL8   | Oxysterol binding protein-like 8                                                 |
| 219421_at   | OSRF     | Osmosis responsive factor                                                        |
| 218196_at   | OSTM1    | Osteopetrosis associated transmembrane protein 1                                 |
| 218209_s_at | P15RS    | Hypothetical protein FLJ10656                                                    |
| 213289_at   | PA2G4    | Proliferation-associated 2G4, 38kDa                                              |
| 200816_s_at | PAFAH1B1 | Platelet-activating factor acetylhydrolase, isoform Ib, alpha subunit 45kDa      |
| 209063_x_at | PAIP1    | Poly(A) binding protein interacting protein 1                                    |
| 210283_x_at | PAIP1    | Poly(A) binding protein interacting protein 1                                    |
| 213754_s_at | PAIP1    | Poly(A) binding protein interacting protein 1                                    |
| 221751_at   | PANK3    | Solute carrier family 2 (facilitated glucose transporter), member 3 pseudogene 1 |
| 202294_at   | PCCB     | Propionyl Coenzyme A carboxylase, beta polypeptide                               |
| 205202_at   | PCMT1    | Protein-L-isoaspartate (D-aspartate) O-methyltransferase                         |
| 208857_s_at | PCMT1    | Protein-L-isoaspartate (D-aspartate) O-methyltransferase                         |
| 212406_s_at | PCMTD2   | Chromosome 20 open reading frame 36                                              |
| 217816_s_at | PCNP     | PEST-containing nuclear protein                                                  |
| 219043_s_at | PDCL3    | Phosducin-like 3                                                                 |
| 211023_at   | PDHB     | Pyruvate dehydrogenase (lipoamide) beta                                          |
| 202658_at   | PEX11B   | Peroxisomal biogenesis factor 11B                                                |
| 201707_at   | PEX19    | Peroxisomal biogenesis factor 19                                                 |
| 203970_s_at | PEX3     | Peroxisomal biogenesis factor 3                                                  |

|             |         |                                                                                                                                                          |
|-------------|---------|----------------------------------------------------------------------------------------------------------------------------------------------------------|
| 217952_x_at | PHF3    | PHD finger protein 3                                                                                                                                     |
| 217954_s_at | PHF3    | PHD finger protein 3                                                                                                                                     |
| 202738_s_at | PHKB    | Phosphorylase kinase, beta                                                                                                                               |
| 202739_s_at | PHKB    | Phosphorylase kinase, beta                                                                                                                               |
| 203492_x_at | PIG8    | Transloklin                                                                                                                                              |
| 203493_s_at | PIG8    | Transloklin                                                                                                                                              |
| 201133_s_at | PJA2    | Praja 2, RING-H2 motif containing                                                                                                                        |
| 212628_at   | PKN2    | Protein kinase N2                                                                                                                                        |
| 201928_at   | PKP4    | Plakophilin 4                                                                                                                                            |
| 201929_s_at | PKP4    | Plakophilin 4                                                                                                                                            |
| 210830_s_at | PON2    | Paraoxonase 2                                                                                                                                            |
| 202165_at   | PPP1R2  | Protein phosphatase 1, regulatory (inhibitor) subunit 2                                                                                                  |
| 204554_at   | PPP1R3D | Protein phosphatase 1, regulatory subunit 3D                                                                                                             |
| 201877_s_at | PPP2R5C | Protein phosphatase 2, regulatory subunit B (B56), gamma isoform                                                                                         |
| 213483_at   | PPWD1   | Peptidylprolyl isomerase domain and WD repeat containing 1                                                                                               |
| 202918_s_at | PREI3   | Preimplantation protein 3                                                                                                                                |
| 212217_at   | PREPL   | Solute carrier family 3 (cystine, dibasic and neutral amino acid transporters, activator of cystine, dibasic and neutral amino acid transport), member 1 |
| 200603_at   | PRKAR1A | Protein kinase, cAMP-dependent, regulatory, type I, alpha (tissue specific extinguisher 1)                                                               |
| 200604_s_at | PRKAR1A | Protein kinase, cAMP-dependent, regulatory, type I, alpha (tissue specific extinguisher 1)                                                               |
| 200605_s_at | PRKAR1A | Protein kinase, cAMP-dependent, regulatory, type I, alpha (tissue specific extinguisher 1)                                                               |
| 205880_at   | PRKD1   | Protein kinase D1                                                                                                                                        |
| 218236_s_at | PRKD3   | Protein kinase D3                                                                                                                                        |
| 209139_s_at | PRKRA   | Protein kinase, interferon-inducible double stranded RNA dependent activator                                                                             |
| 218040_at   | PRPF38B | PRP38 pre-mRNA processing factor 38 (yeast) domain containing B                                                                                          |
| 201699_at   | PSMC6   | Proteasome (prosome, macropain) 26S subunit, ATPase, 6                                                                                                   |
| 202353_s_at | PSMD12  | Proteasome (prosome, macropain) 26S subunit, non-ATPase, 12                                                                                              |
| 201053_s_at | PSMF1   | Proteasome (prosome, macropain) inhibitor subunit 1 (PI31)                                                                                               |
| 201745_at   | PTK9    | PTK9 protein tyrosine kinase 9                                                                                                                           |
| 209896_s_at | PTPN11  | Protein tyrosine phosphatase, non-receptor type 11 (Noonan syndrome 1)                                                                                   |
| 201493_s_at | PUM2    | Pumilio homolog 2 (Drosophila)                                                                                                                           |
| 204020_at   | PURA    | Purine-rich element binding protein A                                                                                                                    |
| 200927_s_at | RAB14   | RAB14, member RAS oncogene family                                                                                                                        |
| 207791_s_at | RAB1A   | RAB1A, member RAS oncogene family                                                                                                                        |
| 208731_at   | RAB2    | RAB2, member RAS oncogene family                                                                                                                         |
| 203885_at   | RAB21   | RAB21, member RAS oncogene family                                                                                                                        |
| 213405_at   | RAB22A  | RAB22A, member RAS oncogene family                                                                                                                       |
| 220955_x_at | RAB23   | RAB23, member RAS oncogene family                                                                                                                        |
| 209084_s_at | RAB28   | RAB28, member RAS oncogene family                                                                                                                        |
| 204547_at   | RAB40B  | RAB40B, member RAS oncogene family                                                                                                                       |
| 203581_at   | RAB4A   | RAB4A, member RAS oncogene family                                                                                                                        |
| 203582_s_at | RAB4A   | RAB4A, member RAS oncogene family                                                                                                                        |
| 210406_s_at | RAB6C   | RAB6C, member RAS oncogene family                                                                                                                        |
| 211961_s_at | RAB7    | RAB7, member RAS oncogene family                                                                                                                         |
| 213313_at   | RABGAP1 | RAB GTPase activating protein 1                                                                                                                          |
| 201244_s_at | RAF1    | V-raf-1 murine leukemia viral oncogene homolog 1                                                                                                         |
| 202101_s_at | RALB    | V-ral simian leukemia viral oncogene homolog B (ras related; GTP binding protein)                                                                        |
| 202677_at   | RASA1   | RAS p21 protein activator (GTPase activating protein) 1                                                                                                  |
| 210621_s_at | RASA1   | RAS p21 protein activator (GTPase activating protein) 1                                                                                                  |
| 203132_at   | RB1     | Retinoblastoma 1 (including osteosarcoma)                                                                                                                |
| 203250_at   | RBM16   | RNA binding motif protein 16                                                                                                                             |
| 218134_s_at | RBM22   | RNA binding motif protein 22                                                                                                                             |

|             |          |                                                                                                   |
|-------------|----------|---------------------------------------------------------------------------------------------------|
| 212591_at   | RBM34    | RNA binding motif protein 34                                                                      |
| 207785_s_at | RBPSUH   | Recombining binding protein suppressor of hairless (Drosophila)                                   |
| 218344_s_at | RCOR3    | REST corepressor 3                                                                                |
| 222203_s_at | RDH14    | Retinol dehydrogenase 14 (all-trans and 9-cis)                                                    |
| 212397_at   | RDX      | Radixin                                                                                           |
| 218428_s_at | REV1L    | REV1-like (yeast)                                                                                 |
| 218323_at   | RHOT1    |                                                                                                   |
| 202130_at   | RIOK3    | RIO kinase 3 (yeast)                                                                              |
| 217865_at   | RNF130   | Ring finger protein 130                                                                           |
| 201823_s_at | RNF14    | Ring finger protein 14                                                                            |
| 201824_at   | RNF14    | Ring finger protein 14                                                                            |
| 221430_s_at | RNF146   | Ring finger protein 146                                                                           |
| 218528_s_at | RNF38    | Ring finger protein 38                                                                            |
| 213044_at   | ROCK1    | Rho-associated, coiled-coil containing protein kinase 1                                           |
| 201528_at   | RPA1     | Replication protein A1, 70kDa                                                                     |
| 201529_s_at | RPA1     | Replication protein A1, 70kDa                                                                     |
| 213694_at   | RSBN1    | Round spermatid basic protein 1                                                                   |
| 212507_at   | RW1      | RW1 protein                                                                                       |
| 205087_at   | RWDD3    | RWD domain containing 3                                                                           |
| 202853_s_at | RYK      | RYK receptor-like tyrosine kinase                                                                 |
| 213413_at   | SBLF     | TFIIA-alpha/beta-like factor                                                                      |
| 215548_s_at | SCFD1    | Sec1 family domain containing 1                                                                   |
| 218649_x_at | SDCCAG1  | Serologically defined colon cancer antigen 1                                                      |
| 202228_s_at | SDFR1    | Stromal cell derived factor receptor 1                                                            |
| 202026_at   | SDHD     | Succinate dehydrogenase complex, subunit D, integral membrane protein                             |
| 209175_at   | SEC23IP  | SEC23 interacting protein                                                                         |
| 202798_at   | SEC24B   | SEC24 related gene family, member B (S. cerevisiae)                                               |
| 201916_s_at | SEC63    | SEC63-like (S. cerevisiae)                                                                        |
| 202318_s_at | SENP6    | SUMO1/sentrin specific protease 6                                                                 |
| 202319_at   | SENP6    | SUMO1/sentrin specific protease 6                                                                 |
| 208939_at   | SEPHS1   | Selenophosphate synthetase 1                                                                      |
| 208671_at   | SERINC1  | Tumor differentially expressed 2                                                                  |
| 221471_at   | SERINC3  | Tumor differentially expressed 1                                                                  |
| 202060_at   | SH2BP1   | SH2 domain binding protein 1 (tetratricopeptide repeat containing)                                |
| 202777_at   | SHOC2    | Soc-2 suppressor of clear homolog (C. elegans)                                                    |
| 200711_s_at | SKP1A    | S-phase kinase-associated protein 1A (p19A)                                                       |
| 200718_s_at | SKP1A    | S-phase kinase-associated protein 1A (p19A)                                                       |
| 203340_s_at | SLC25A12 | Solute carrier family 25 (mitochondrial carrier, Aralar), member 12                               |
| 218989_x_at | SLC30A5  | Solute carrier family 30 (zinc transporter), member 5                                             |
| 218519_at   | SLC35A5  | Solute carrier family 35, member A5                                                               |
| 206875_s_at | SLK      | STE20-like kinase (yeast)                                                                         |
| 217828_at   | SLTM     | Modulator of estrogen induced transcription                                                       |
| 203075_at   | SMAD2    | SMAD, mothers against DPP homolog 2 (Drosophila)                                                  |
| 203077_s_at | SMAD2    | SMAD, mothers against DPP homolog 2 (Drosophila)                                                  |
| 202527_s_at | SMAD4    | SMAD, mothers against DPP homolog 4 (Drosophila)                                                  |
| 200084_at   | SMAP     | Small acidic protein                                                                              |
| 201784_s_at | SMAP     | Small acidic protein                                                                              |
| 218137_s_at | SMAP1    | Stromal membrane-associated protein 1                                                             |
| 206542_s_at | SMARCA2  | SWI/SNF related, matrix associated, actin dependent regulator of chromatin, subfamily a, member 2 |
| 206544_x_at | SMARCA2  | SWI/SNF related, matrix associated, actin dependent regulator of chromatin, subfamily a, member 2 |
| 212257_s_at | SMARCA2  | SWI/SNF related, matrix associated, actin dependent regulator of chromatin, subfamily a, member 2 |



|             |         |                                                                                                   |
|-------------|---------|---------------------------------------------------------------------------------------------------|
| 217707_x_at | SMARCA2 | SWI/SNF related, matrix associated, actin dependent regulator of chromatin, subfamily a, member 2 |
| 202983_at   | SMARCA3 | SWI/SNF related, matrix associated, actin dependent regulator of chromatin, subfamily a, member 3 |
| 202303_x_at | SMARCA5 | SWI/SNF related, matrix associated, actin dependent regulator of chromatin, subfamily a, member 5 |
| 213251_at   | SMARCA5 | SWI/SNF related, matrix associated, actin dependent regulator of chromatin, subfamily a, member 5 |
| 213859_x_at | SMARCA5 | SWI/SNF related, matrix associated, actin dependent regulator of chromatin, subfamily a, member 5 |
| 201589_at   | SMC1L1  | SMC1 structural maintenance of chromosomes 1-like 1 (yeast)                                       |
| 212927_at   | SMC5L1  | SMC5 structural maintenance of chromosomes 5-like 1 (yeast)                                       |
| 202113_s_at | SNX2    | Sorting nexin 2                                                                                   |
| 202114_at   | SNX2    | Sorting nexin 2                                                                                   |
| 217792_at   | SNX5    | Sorting nexin 5                                                                                   |
| 206020_at   | SOCS6   | Suppressor of cytokine signaling 6                                                                |
| 214988_s_at | SON     | SON DNA binding protein                                                                           |
| 213168_at   | SP3     | Sp3 transcription factor                                                                          |
| 206272_at   | SPHAR   | S-phase response (cyclin-related)                                                                 |
| 202277_at   | SPTLC1  | Serine palmitoyltransferase, long chain base subunit 1                                            |
| 212058_at   | SR140   | U2-associated SR140 protein                                                                       |
| 212060_at   | SR140   | U2-associated SR140 protein                                                                       |
| 212061_at   | SR140   | U2-associated SR140 protein                                                                       |
| 208920_at   | SRI     | Sorcin                                                                                            |
| 200007_at   | SRP14   | Signal recognition particle 14kDa (homologous Alu RNA binding protein)                            |
| 201273_s_at | SRP9    | Signal recognition particle 9kDa                                                                  |
| 202817_s_at | SS18    | Synovial sarcoma translocation, chromosome 18                                                     |
| 213027_at   | SSA2    | TROVE domain family, member 2                                                                     |
| 201138_s_at | SSB     | Sjogren syndrome antigen B (autoantigen La)                                                       |
| 208666_s_at | ST13    | Suppression of tumorigenicity 13 (colon carcinoma) (Hsp70 interacting protein)                    |
| 209649_at   | STAM2   | Signal transducing adaptor molecule (SH3 domain and ITAM motif) 2                                 |
| 208948_s_at | STAU1   |                                                                                                   |
| 211505_s_at | STAU1   |                                                                                                   |
| 212631_at   | STX7    | Syntaxin 7                                                                                        |
| 212632_at   | STX7    | Syntaxin 7                                                                                        |
| 203310_at   | STXBP3  | Syntaxin binding protein 3                                                                        |
| 202930_s_at | SUCLA2  | Succinate-CoA ligase, ADP-forming, beta subunit                                                   |
| 217874_at   | SUCLG1  | Succinate-CoA ligase, GDP-forming, alpha subunit                                                  |
| 212459_x_at | SUCLG2  | Succinate-CoA ligase, GDP-forming, beta subunit                                                   |
| 215772_x_at | SUCLG2  | Succinate-CoA ligase, GDP-forming, beta subunit                                                   |
| 208761_s_at | SUMO1   | SMT3 suppressor of mif two 3 homolog 1 (yeast)                                                    |
| 211069_s_at | SUMO1   | SMT3 suppressor of mif two 3 homolog 1 (yeast)                                                    |
| 209362_at   | SURB7   | SRB7 suppressor of RNA polymerase B homolog (yeast)                                               |
| 201023_at   | TAF7    | TAF7 RNA polymerase II, TATA box binding protein (TBP)-associated factor, 55kDa                   |
| 221618_s_at | TAF9L   | TAF9-like RNA polymerase II, TATA box binding protein (TBP)-associated factor, 31kDa              |
| 209451_at   | TANK    | TRAF family member-associated NFKB activator                                                      |
| 207627_s_at | TFCP2   | Transcription factor CP2                                                                          |
| 212043_at   | TGOLN2  | Trans-golgi network protein 2                                                                     |
| 202606_s_at | TLK1    | Tousled-like kinase 1                                                                             |
| 208943_s_at | TLOC1   | Translocation protein 1                                                                           |
| 212352_s_at | TMED10  | Transmembrane trafficking protein                                                                 |
| 214658_at   | TMED7   | Transmembrane emp24 protein transport domain containing 7                                         |
| 218477_at   | TMEM14A | Transmembrane protein 14A                                                                         |
| 221452_s_at | TMEM14B | Transmembrane protein 14B                                                                         |
| 200620_at   | TMEM59  | Transmembrane protein 59                                                                          |
| 65630_at    | TMEM80  | Hypothetical protein LOC283232                                                                    |

|             |           |                                                                                                                               |
|-------------|-----------|-------------------------------------------------------------------------------------------------------------------------------|
| 218467_at   | TNFSF5IP1 | Tumor necrosis factor superfamily, member 5-induced protein 1                                                                 |
| 212635_at   | TNPO1     | Transportin 1                                                                                                                 |
| 212408_at   | TOR1AIP1  | Torsin A interacting protein 1                                                                                                |
| 216100_s_at | TOR1AIP1  | Torsin A interacting protein 1                                                                                                |
| 217959_s_at | TRAPPC4   | Trafficking protein particle complex 4                                                                                        |
| 201546_at   | TRIP12    | Thyroid hormone receptor interactor 12                                                                                        |
| 203732_at   | TRIP4     | Thyroid hormone receptor interactor 4                                                                                         |
| 201515_s_at | TSN       | Translin                                                                                                                      |
| 203983_at   | TSNAX     | Translin-associated factor X                                                                                                  |
| 202266_at   | TTRAP     | TRAF and TNF receptor associated protein                                                                                      |
| 203690_at   | TUBGCP3   | Tubulin, gamma complex associated protein 3                                                                                   |
| 219201_s_at | TWSG1     | Twisted gastrulation homolog 1 (Drosophila)                                                                                   |
| 209115_at   | UBE1C     | Ubiquitin-activating enzyme E1C (UBA3 homolog, yeast)                                                                         |
| 201899_s_at | UBE2A     | Ubiquitin-conjugating enzyme E2A (RAD6 homolog)                                                                               |
| 209142_s_at | UBE2G1    | Ubiquitin-conjugating enzyme E2G 1 (UBC7 homolog, C. elegans)                                                                 |
| 201535_at   | UBL3      | Ubiquitin-like 3                                                                                                              |
| 215884_s_at | UBQLN2    | Ubiquilin 2                                                                                                                   |
| 212760_at   | UBR2      | Ubiquitin protein ligase E3 component n-recogin 2                                                                             |
| 203583_at   | UNC50     | Unc-50 homolog (C. elegans)                                                                                                   |
| 203519_s_at | UPF2      | UPF2 regulator of nonsense transcripts homolog (yeast)                                                                        |
| 206958_s_at | UPF3A     | UPF3 regulator of nonsense transcripts homolog A (yeast)                                                                      |
| 214323_s_at | UPF3A     | UPF3 regulator of nonsense transcripts homolog A (yeast)                                                                      |
| 218757_s_at | UPF3B     | UPF3 regulator of nonsense transcripts homolog B (yeast)                                                                      |
| 200883_at   | UQCRC2    | Ubiquinol-cytochrome c reductase core protein II                                                                              |
| 212600_s_at | UQCRC2    | Ubiquinol-cytochrome c reductase core protein II                                                                              |
| 202413_s_at | USP1      | Ubiquitin specific protease 1                                                                                                 |
| 201099_at   | USP9X     | Ubiquitin specific protease 9, X-linked (fat facets-like, Drosophila)                                                         |
| 206624_at   | USP9Y     | Ubiquitin specific protease 9, Y-linked (fat facets-like, Drosophila)                                                         |
| 203614_at   | UTP14C    | UTP14, U3 small nucleolar ribonucleoprotein, homolog C (yeast)                                                                |
| 203241_at   | UVRAG     | UV radiation resistance associated gene                                                                                       |
| 201472_at   | VBP1      | Von Hippel-Lindau binding protein 1                                                                                           |
| 218396_at   | VPS13C    | Vacuolar protein sorting 13C (yeast)                                                                                          |
| 217837_s_at | VPS24     | Vacuolar protein sorting 24 (yeast)                                                                                           |
| 201807_at   | VPS26A    |                                                                                                                               |
| 209268_at   | VPS45A    | Vacuolar protein sorting 45A (yeast)                                                                                          |
| 208933_s_at | WAC       | WW domain containing adaptor with coiled-coil                                                                                 |
| 212598_at   | WDFY3     | WD repeat and FYVE domain containing 3                                                                                        |
| 212606_at   | WDFY3     | WD repeat and FYVE domain containing 3                                                                                        |
| 221531_at   | WDR61     | WD repeat domain 61                                                                                                           |
| 221532_s_at | WDR61     | WD repeat domain 61                                                                                                           |
| 201295_s_at | WSB1      | WD repeat and SOCS box-containing 1                                                                                           |
| 205672_at   | XPA       | Xeroderma pigmentosum, complementation group A                                                                                |
| 208775_at   | XPO1      | Exportin 1 (CRM1 homolog, yeast)                                                                                              |
| 208643_s_at | XRCC5     | X-ray repair complementing defective repair in Chinese hamster cells 5 (double-strand-break rejoining; Ku autoantigen, 80kDa) |
| 217783_s_at | YPEL5     | Yippee-like 5 (Drosophila)                                                                                                    |
| 212455_at   | YT521     |                                                                                                                               |
| 213077_at   | YTHDC2    | YTH domain containing 2                                                                                                       |
| 221613_s_at | ZA20D3    | Zinc finger, A20 domain containing 3                                                                                          |
| 218348_s_at | ZC3H7A    | Zinc finger CCCH-type containing 7A                                                                                           |
| 221193_s_at | ZCCHC10   | Zinc finger, CCHC domain containing 10                                                                                        |
| 212982_at   | ZDHHC17   | Zinc finger, DHHC-type containing 17                                                                                          |

|             |         |                                                                            |
|-------------|---------|----------------------------------------------------------------------------|
| 218249_at   | ZDHHC6  | Zinc finger, DHHC-type containing 6                                        |
| 202979_s_at | ZF      | HCF-binding transcription factor Zhangfei                                  |
| 202137_s_at | ZMYND11 | Zinc finger, MYND domain containing 11                                     |
| 209741_x_at | ZNF291  | Zinc finger protein 291                                                    |
| 200867_at   | ZNF313  | Zinc finger protein 313                                                    |
| 205514_at   | ZNF415  | Zinc finger protein 415                                                    |
| 206158_s_at | ZNF9    | Zinc finger protein 9 (a cellular retroviral nucleic acid binding protein) |
| 201051_at   |         |                                                                            |
| 206809_s_at |         |                                                                            |
| 212623_at   |         | Transmembrane protein 41B                                                  |
| 218490_s_at |         |                                                                            |

## CORRELATED GENES

| <b>Systematic</b> | <b>Common</b> |
|-------------------|---------------|
| 202653_s_at       | 7-Mar         |
| 202654_x_at       |               |
| 200015_s_at       |               |
| 200778_s_at       |               |
| 212698_s_at       |               |
| 214720_x_at       |               |
| 202169_s_at       | AASDHPPT      |
| 209027_s_at       | ABI1          |
| 222230_s_at       | ACTR10        |
| 200996_at         | ACTR3         |
| 213102_at         | ACTR3         |
| 203935_at         | ACVR1         |
| 221761_at         | ADSS          |
| 218534_s_at       | AGGF1         |
| 203156_at         | AKAP11        |
| 202125_s_at       | ALS2CR3       |
| 201964_at         | ALS4          |
| 218167_at         | AMZ2          |
| 221825_at         | ANGEL2        |
| 208773_s_at       | ANKHD1        |
| 212798_s_at       | ANKMY2        |
| 213005_s_at       | ANKRD15       |
| 212211_at         | ANKRD17       |
| 201366_at         | ANXA7         |
| 209860_s_at       | ANXA7         |
| 203525_s_at       | APC           |
| 202630_at         | APPBP2        |
| 218098_at         | ARFGEF2       |
| 218230_at         | ARFIP1        |
| 203910_at         | ARHGAP29      |
| 217936_at         | ARHGAP5       |
| 221230_s_at       | ARID4B        |

|             |           |
|-------------|-----------|
| 203486_s_at | ARMC8     |
| 201855_s_at | ASCIZ     |
| 222103_at   | ATF1      |
| 221492_s_at | ATG3      |
| 200818_at   | ATP5O     |
| 201443_s_at | ATP6AP2   |
| 201444_s_at | ATP6AP2   |
| 200096_s_at | ATP6V0E   |
| 208860_s_at | ATRX      |
| 208861_s_at | ATRX      |
| 203232_s_at | ATXN1     |
| 203080_s_at | BAZ2B     |
| 201084_s_at | BCLAF1    |
| 215440_s_at | BEXL1     |
| 218090_s_at | BRWD2     |
| 202946_s_at | BTBD3     |
| 201456_s_at | BUB3      |
| 218331_s_at | C10orf18  |
| 211376_s_at | C10orf86  |
| 219067_s_at | C10orf86  |
| 213239_at   | C13orf24  |
| 218139_s_at | C14orf108 |
| 202623_at   | C14orf11  |
| 212870_at   | C14orf138 |
| 209092_s_at | C17orf25  |
| 220992_s_at | C1orf25   |
| 220477_s_at | C20orf30  |
| 221787_at   | C6orf120  |
| 218195_at   | C6orf211  |
| 218877_s_at | C6orf75   |
| 205684_s_at | C9orf55   |
| 203801_at   | CACYBP    |
| 212711_at   | CAMSAP1   |
| 207483_s_at | CAND1     |
| 213165_at   | CAP350    |

|             |         |
|-------------|---------|
| 203356_at   | CAPN7   |
| 203357_s_at | CAPN7   |
| 201238_s_at | CAPZA2  |
| 207467_x_at | CAST    |
| 212586_at   | CAST    |
| 201518_at   | CBX1    |
| 200984_s_at | CD59    |
| 221449_s_at | CDA08   |
| 202892_at   | CDC23   |
| 209112_at   | CDKN1B  |
| 204739_at   | CENPC1  |
| 209662_at   | CETN3   |
| 218085_at   | CHMP5   |
| 219356_s_at | CHMP5   |
| 218439_s_at | COMMD10 |
| 202467_s_at | COPS2   |
| 218042_at   | COPS4   |
| 202143_s_at | COPS8   |
| 201200_at   | CREG1   |
| 208669_s_at | CRI1    |
| 208670_s_at | CRI1    |
| 220044_x_at | CROP    |
| 202610_s_at | CRSP2   |
| 202611_s_at | CRSP2   |
| 204350_s_at | CRSP9   |
| 219767_s_at | CRYZL1  |
| 201111_at   | CSE1L   |
| 209259_s_at | CSPG6   |
| 202521_at   | CTCF    |
| 200764_s_at | CTNNA1  |
| 200765_x_at | CTNNA1  |
| 210844_x_at | CTNNA1  |
| 203079_s_at | CUL2    |
| 201423_s_at | CUL4A   |
| 202213_s_at | CUL4B   |

|             |             |
|-------------|-------------|
| 202214_s_at | CUL4B       |
| 203531_at   | CUL5        |
| 200794_x_at | DAZAP2      |
| 212919_at   | DCP2        |
| 218013_x_at | DCTN4       |
| 201241_at   | DDX1        |
| 202462_s_at | DDX46       |
| 200934_at   | DEK         |
| 218102_at   | DERA        |
| 212648_at   | DHX29       |
| 201581_at   | DJ971N18.2  |
| 202560_s_at | DKFZP547E10 |
| 221596_s_at | DKFZP564O05 |
| 202514_at   | DLG1        |
| 202116_at   | DPF2        |
| 202673_at   | DPM1        |
| 209572_s_at | EED         |
| 221528_s_at | ELMO2       |
| 55692_at    | ELMO2       |
| 201769_at   | ENTH        |
| 202176_at   | ERCC3       |
| 222127_s_at | EXOC1       |
| 212131_at   | FAM61A      |
| 212132_at   | FAM61A      |
| 209004_s_at | FBXL5       |
| 222119_s_at | FBXO11      |
| 202271_at   | FBXO28      |
| 218432_at   | FBXO3       |
| 209455_at   | FBXW11      |
| 209630_s_at | FBXW2       |
| 212367_at   | FEM1B       |
| 212373_at   | FEM1B       |
| 213341_at   | FEM1C       |
| 202302_s_at | FLJ11021    |
| 218449_at   | FLJ11200    |

|             |          |
|-------------|----------|
| 218179_s_at | FLJ12716 |
| 212482_at   | FLJ13910 |
| 219467_at   | FLJ20125 |
| 219858_s_at | FLJ20160 |
| 222209_s_at | FLJ22104 |
| 213294_at   | FLJ38348 |
| 203689_s_at | FMR1     |
| 215245_x_at | FMR1     |
| 209702_at   | FTO      |
| 218373_at   | FTS      |
| 204299_at   | FUSIP1   |
| 203282_at   | GBE1     |
| 217990_at   | GMPR2    |
| 202615_at   | GNAQ     |
| 212243_at   | GRINL1A  |
| 212244_at   | GRINL1A  |
| 213357_at   | GTF2H5   |
| 218343_s_at | GTF3C3   |
| 201554_x_at | GYG1     |
| 212205_at   | H2AFV    |
| 212206_s_at | H2AFV    |
| 203138_at   | HAT1     |
| 209274_s_at | HBLD2    |
| 212785_s_at | HDCMA18P |
| 217902_s_at | HERC2    |
| 203711_s_at | HIBCH    |
| 212293_at   | HIPK1    |
| 218946_at   | HIRIP5   |
| 218152_at   | HMG20A   |
| 209786_at   | HMGN4    |
| 204112_s_at | HNMT     |
| 211929_at   | HNRPA3   |
| 201132_at   | HNRPH2   |
| 208990_s_at | HNRPH3   |
| 209512_at   | HSDL2    |



|             |           |
|-------------|-----------|
| 221622_s_at | HT007     |
| 202602_s_at | HTATSF1   |
| 203327_at   | IDE       |
| 212223_at   | IDS       |
| 202491_s_at | IKBKAP    |
| 209566_at   | INSIG2    |
| 217908_s_at | IQWD1     |
| 209907_s_at | ITSN2     |
| 201643_x_at | JMJD1B    |
| 210878_s_at | JMJD1B    |
| 212357_at   | KIAA0280  |
| 203288_at   | KIAA0355  |
| 212428_at   | KIAA0368  |
| 203048_s_at | KIAA0372  |
| 203049_s_at | KIAA0372  |
| 212215_at   | KIAA0436  |
| 201778_s_at | KIAA0494  |
| 212402_at   | KIAA0853  |
| 212325_at   | KIAA1102  |
| 212779_at   | KIAA1109  |
| 221736_at   | KIAA1219  |
| 212453_at   | KIAA1279  |
| 212163_at   | KIDINS220 |
| 203333_at   | KIFAP3    |
| 217906_at   | KLHDC2    |
| 34031_i_at  | KRIT1     |
| 214709_s_at | KTN1      |
| 202020_s_at | LANCL1    |
| 200673_at   | LAPTM4A   |
| 202377_at   | LEPR      |
| 201595_s_at | LEREPO4   |
| 202386_s_at | LKAP      |
| 218191_s_at | LMBRD1    |
| 218303_x_at | LOC51315  |
| 220770_s_at | LOC63920  |

|             |           |
|-------------|-----------|
| 212833_at   | LOC91137  |
| 213220_at   | LOC92482  |
| 207358_x_at | MACF1     |
| 212184_s_at | MAP3K7IP2 |
| 218311_at   | MAP4K3    |
| 203553_s_at | MAP4K5    |
| 203218_at   | MAPK9     |
| 200624_s_at | MATR3     |
| 200626_s_at | MATR3     |
| 214363_s_at | MATR3     |
| 209580_s_at | MBD4      |
| 214047_s_at | MBD4      |
| 218288_s_at | MDS025    |
| 202616_s_at | MECP2     |
| 217843_s_at | MED4      |
| 221570_s_at | METTTL5   |
| 213065_at   | MGC23401  |
| 218138_at   | MKKS      |
| 218259_at   | MKL2      |
| 202520_s_at | MLH1      |
| 218212_s_at | MOCS2     |
| 221381_s_at | MORF4     |
| 217982_s_at | MORF4L1   |
| 212199_at   | MRFAP1L1  |
| 218536_at   | MRS2L     |
| 218716_x_at | MTO1      |
| 208047_s_at | NAB1      |
| 219368_at   | NAP1L2    |
| 201384_s_at | NBR1      |
| 207738_s_at | NCKAP1    |
| 209105_at   | NCOA1     |
| 209106_at   | NCOA1     |
| 208979_at   | NCOA6     |
| 200854_at   | NCOR1     |
| 200857_s_at | NCOR1     |

|             |          |
|-------------|----------|
| 217800_s_at | NDFIP1   |
| 210817_s_at | NDP52    |
| 203613_s_at | NDUFB6   |
| 212530_at   | NEK7     |
| 212678_at   | NF1      |
| 218127_at   | NFYB     |
| 218129_s_at | NFYB     |
| 202215_s_at | NFYC     |
| 219353_at   | NHLRC2   |
| 209075_s_at | NIFUN    |
| 202783_at   | NNT      |
| 202784_s_at | NNT      |
| 210097_s_at | NOL7     |
| 213838_at   | NOL7     |
| 201455_s_at | NPEPPS   |
| 220248_x_at | NSFL1C   |
| 213461_at   | NUDT21   |
| 209073_s_at | NUMB     |
| 202184_s_at | NUP133   |
| 203351_s_at | ORC4L    |
| 209485_s_at | OSBPL1A  |
| 212585_at   | OSBPL8   |
| 219421_at   | OSRF     |
| 218196_at   | OSTM1    |
| 218209_s_at | P15RS    |
| 213289_at   | PA2G4    |
| 200816_s_at | PAFAH1B1 |
| 209063_x_at | PAIP1    |
| 210283_x_at | PAIP1    |
| 213754_s_at | PAIP1    |
| 221751_at   | PANK3    |
| 202294_at   | PCCB     |
| 205202_at   | PCMT1    |
| 208857_s_at | PCMT1    |
| 212406_s_at | PCMTD2   |

|             |         |
|-------------|---------|
| 217816_s_at | PCNP    |
| 219043_s_at | PDCL3   |
| 211023_at   | PDHB    |
| 202658_at   | PEX11B  |
| 201707_at   | PEX19   |
| 203970_s_at | PEX3    |
| 217952_x_at | PHF3    |
| 217954_s_at | PHF3    |
| 202738_s_at | PHKB    |
| 202739_s_at | PHKB    |
| 203492_x_at | PIG8    |
| 203493_s_at | PIG8    |
| 201133_s_at | PJA2    |
| 212628_at   | PKN2    |
| 201928_at   | PKP4    |
| 201929_s_at | PKP4    |
| 210830_s_at | PON2    |
| 202165_at   | PPP1R2  |
| 204554_at   | PPP1R3D |
| 201877_s_at | PPP2R5C |
| 213483_at   | PPWD1   |
| 202918_s_at | PREI3   |
| 212217_at   | PREPL   |
| 200603_at   | PRKAR1A |
| 200604_s_at | PRKAR1A |
| 200605_s_at | PRKAR1A |
| 205880_at   | PRKD1   |
| 218236_s_at | PRKD3   |
| 209139_s_at | PRKRA   |
| 218040_at   | PRPF38B |
| 201699_at   | PSMC6   |
| 202353_s_at | PSMD12  |
| 201053_s_at | PSMF1   |
| 201745_at   | PTK9    |
| 209896_s_at | PTPN11  |

|             |         |
|-------------|---------|
| 201493_s_at | PUM2    |
| 204020_at   | PURA    |
| 200927_s_at | RAB14   |
| 207791_s_at | RAB1A   |
| 208731_at   | RAB2    |
| 203885_at   | RAB21   |
| 213405_at   | RAB22A  |
| 220955_x_at | RAB23   |
| 209084_s_at | RAB28   |
| 204547_at   | RAB40B  |
| 203581_at   | RAB4A   |
| 203582_s_at | RAB4A   |
| 210406_s_at | RAB6C   |
| 211961_s_at | RAB7    |
| 213313_at   | RABGAP1 |
| 201244_s_at | RAF1    |
| 202101_s_at | RALB    |
| 202677_at   | RASA1   |
| 210621_s_at | RASA1   |
| 203132_at   | RB1     |
| 203250_at   | RBM16   |
| 218134_s_at | RBM22   |
| 212591_at   | RBM34   |
| 207785_s_at | RBPSUH  |
| 218344_s_at | RCOR3   |
| 222203_s_at | RDH14   |
| 212397_at   | RDX     |
| 218428_s_at | REV1L   |
| 218323_at   | RHOT1   |
| 202130_at   | RIOK3   |
| 217865_at   | RNF130  |
| 201823_s_at | RNF14   |
| 201824_at   | RNF14   |
| 221430_s_at | RNF146  |
| 218528_s_at | RNF38   |

|             |          |
|-------------|----------|
| 213044_at   | ROCK1    |
| 201528_at   | RPA1     |
| 201529_s_at | RPA1     |
| 213694_at   | RSBN1    |
| 212507_at   | RW1      |
| 205087_at   | RWDD3    |
| 202853_s_at | RYK      |
| 213413_at   | SBLF     |
| 215548_s_at | SCFD1    |
| 218649_x_at | SDCCAG1  |
| 202228_s_at | SDFR1    |
| 202026_at   | SDHD     |
| 209175_at   | SEC23IP  |
| 202798_at   | SEC24B   |
| 201916_s_at | SEC63    |
| 202318_s_at | SENP6    |
| 202319_at   | SENP6    |
| 208939_at   | SEPHS1   |
| 208671_at   | SERINC1  |
| 221471_at   | SERINC3  |
| 202060_at   | SH2BP1   |
| 202777_at   | SHOC2    |
| 200711_s_at | SKP1A    |
| 200718_s_at | SKP1A    |
| 203340_s_at | SLC25A12 |
| 218989_x_at | SLC30A5  |
| 218519_at   | SLC35A5  |
| 206875_s_at | SLK      |
| 217828_at   | SLTM     |
| 203075_at   | SMAD2    |
| 203077_s_at | SMAD2    |
| 202527_s_at | SMAD4    |
| 200084_at   | SMAP     |
| 201784_s_at | SMAP     |
| 218137_s_at | SMAP1    |

|             |         |
|-------------|---------|
| 206542_s_at | SMARCA2 |
| 206544_x_at | SMARCA2 |
| 212257_s_at | SMARCA2 |
| 217707_x_at | SMARCA2 |
| 202983_at   | SMARCA3 |
| 202303_x_at | SMARCA5 |
| 213251_at   | SMARCA5 |
| 213859_x_at | SMARCA5 |
| 201589_at   | SMC1L1  |
| 212927_at   | SMC5L1  |
| 202113_s_at | SNX2    |
| 202114_at   | SNX2    |
| 217792_at   | SNX5    |
| 206020_at   | SOCS6   |
| 214988_s_at | SON     |
| 213168_at   | SP3     |
| 206272_at   | SPHAR   |
| 202277_at   | SPTLC1  |
| 212058_at   | SR140   |
| 212060_at   | SR140   |
| 212061_at   | SR140   |
| 208920_at   | SRI     |
| 200007_at   | SRP14   |
| 201273_s_at | SRP9    |
| 202817_s_at | SS18    |
| 213027_at   | SSA2    |
| 201138_s_at | SSB     |
| 208666_s_at | ST13    |
| 209649_at   | STAM2   |
| 208948_s_at | STAU1   |
| 211505_s_at | STAU1   |
| 212631_at   | STX7    |
| 212632_at   | STX7    |
| 203310_at   | STXBP3  |
| 202930_s_at | SUCLA2  |

|             |           |
|-------------|-----------|
| 217874_at   | SUCLG1    |
| 212459_x_at | SUCLG2    |
| 215772_x_at | SUCLG2    |
| 208761_s_at | SUMO1     |
| 211069_s_at | SUMO1     |
| 209362_at   | SURB7     |
| 201023_at   | TAF7      |
| 221618_s_at | TAF9L     |
| 209451_at   | TANK      |
| 207627_s_at | TFCP2     |
| 212043_at   | TGOLN2    |
| 202606_s_at | TLK1      |
| 208943_s_at | TLOC1     |
| 212352_s_at | TMED10    |
| 214658_at   | TMED7     |
| 218477_at   | TMEM14A   |
| 221452_s_at | TMEM14B   |
| 200620_at   | TMEM59    |
| 65630_at    | TMEM80    |
| 218467_at   | TNFSF5IP1 |
| 212635_at   | TNPO1     |
| 212408_at   | TOR1AIP1  |
| 216100_s_at | TOR1AIP1  |
| 217959_s_at | TRAPPC4   |
| 201546_at   | TRIP12    |
| 203732_at   | TRIP4     |
| 201515_s_at | TSN       |
| 203983_at   | TSNAX     |
| 202266_at   | TTRAP     |
| 203690_at   | TUBGCP3   |
| 219201_s_at | TWSG1     |
| 209115_at   | UBE1C     |
| 201899_s_at | UBE2A     |
| 209142_s_at | UBE2G1    |
| 201535_at   | UBL3      |



|             |         |
|-------------|---------|
| 215884_s_at | UBQLN2  |
| 212760_at   | UBR2    |
| 203583_at   | UNC50   |
| 203519_s_at | UPF2    |
| 206958_s_at | UPF3A   |
| 214323_s_at | UPF3A   |
| 218757_s_at | UPF3B   |
| 200883_at   | UQCRC2  |
| 212600_s_at | UQCRC2  |
| 202413_s_at | USP1    |
| 201099_at   | USP9X   |
| 206624_at   | USP9Y   |
| 203614_at   | UTP14C  |
| 203241_at   | UVRAG   |
| 201472_at   | VBP1    |
| 218396_at   | VPS13C  |
| 217837_s_at | VPS24   |
| 201807_at   | VPS26A  |
| 209268_at   | VPS45A  |
| 208933_s_at | WAC     |
| 212598_at   | WDFY3   |
| 212606_at   | WDFY3   |
| 221531_at   | WDR61   |
| 221532_s_at | WDR61   |
| 201295_s_at | WSB1    |
| 205672_at   | XPA     |
| 208775_at   | XPO1    |
| 208643_s_at | XRCC5   |
| 217783_s_at | YPEL5   |
| 212455_at   | YT521   |
| 213077_at   | YTHDC2  |
| 221613_s_at | ZA20D3  |
| 218348_s_at | ZC3H7A  |
| 221193_s_at | ZCCHC10 |
| 212982_at   | ZDHHC17 |

|             |         |
|-------------|---------|
| 218249_at   | ZDHHC6  |
| 202979_s_at | ZF      |
| 202137_s_at | ZMYND11 |
| 209741_x_at | ZNF291  |
| 200867_at   | ZNF313  |
| 205514_at   | ZNF415  |
| 206158_s_at | ZNF9    |
| 201051_at   |         |
| 206809_s_at |         |
| 212623_at   |         |
| 218490_s_at |         |

## **Description**

Membrane-associated ring finger (C3HC4) 7

Membrane-associated ring finger (C3HC4) 7

Septin 2

Septin 2

Septin 10

Septin 10

Aminoadipate-semialdehyde dehydrogenase-phosphopantetheinyl transferase

Abl-interactor 1

Actin-related protein 10 homolog (*S. cerevisiae*)

ARP3 actin-related protein 3 homolog (yeast)

ARP3 actin-related protein 3 homolog (yeast)

Activin A receptor, type I

Adenylosuccinate synthase

Angiogenic factor with G patch and FHA domains 1

A kinase (PRKA) anchor protein 11

Amyotrophic lateral sclerosis 2 (juvenile) chromosome region, candidate 3

Amyotrophic lateral sclerosis 4

Similar to RIKEN cDNA 2610307I21

Ankyrin repeat and KH domain containing 1

Ankyrin repeat and MYND domain containing 2

Ankyrin repeat domain 15

Ankyrin repeat domain 17

Annexin A7

Annexin A7

Adenomatosis polyposis coli

Amyloid beta precursor protein (cytoplasmic tail) binding protein 2

ADP-ribosylation factor guanine nucleotide-exchange factor 2 (brefeldin A-inhibited)

ADP-ribosylation factor interacting protein 1 (arfaptin 1)

Rho GTPase activating protein 29

synonyms: p190-B, RhoGAP5; isoform a is encoded by transcript variant 1;

AT rich interactive domain 4B (RBP1- like)

Armadillo repeat containing 8

ATM/ATR-Substrate Chk2-Interacting Zn<sup>2+</sup>-finger protein

Activating transcription factor 1

APG3 autophagy 3-like (*S. cerevisiae*)

ATP synthase, H<sup>+</sup> transporting, mitochondrial F1 complex, O subunit (oligomycin sensitivity conferring protein)

ATPase, H<sup>+</sup> transporting, lysosomal accessory protein 2

ATPase, H<sup>+</sup> transporting, lysosomal accessory protein 2

ATPase, H<sup>+</sup> transporting, lysosomal 9kDa, V0 subunit e

Alpha thalassemia/mental retardation syndrome X-linked (RAD54 homolog, *S. cerevisiae*)

Alpha thalassemia/mental retardation syndrome X-linked (RAD54 homolog, *S. cerevisiae*)

Ataxin 1

Bromodomain adjacent to zinc finger domain, 2B

Acetyl-CoA carboxylase, biotin carboxylase subunit (CAC2)

Brain expressed X-linked-like 1

Bromodomain and WD repeat domain containing 2

BTB (POZ) domain containing 3

BUB3 budding uninhibited by benzimidazoles 3 homolog (yeast)

Chromosome 10 open reading frame 18

Chromosome 10 open reading frame 86

Chromosome 10 open reading frame 86

Chromosome 13 open reading frame 24

Chromosome 14 open reading frame 108

Chromosome 14 open reading frame 11

Chromosome 14 open reading frame 138

Chromosome 17 open reading frame 25

Chromosome 1 open reading frame 25

Chromosome 20 open reading frame 30

synonym: bA160E12.4; Homo sapiens chromosome 6 open reading frame 120 (C6orf120), mRNA.

Chromosome 6 open reading frame 211

Chromosome 6 open reading frame 75

Chromosome 9 open reading frame 55

Calcyclin binding protein

Calmodulin regulated spectrin-associated protein 1

Cullin-associated and neddylation-dissociated 1

Centrosome-associated protein 350

Calpain 7

Calpain 7

Capping protein (actin filament) muscle Z-line, alpha 2

Calpastatin

Calpastatin

Chromobox homolog 1 (HP1 beta homolog Drosophila )

CD59 antigen p18-20 (antigen identified by monoclonal antibodies 16.3A5, EJ16, EJ30, EL32 and G344)

T-cell immunomodulatory protein

CDC23 (cell division cycle 23, yeast, homolog)

Cyclin-dependent kinase inhibitor 1B (p27, Kip1)

Centromere protein C 1

Centrin, EF-hand protein, 3 (CDC31 homolog, yeast)

Chromatin modifying protein 5

Chromatin modifying protein 5

COMM domain containing 10

COP9 constitutive photomorphogenic homolog subunit 2 (Arabidopsis)

COP9 constitutive photomorphogenic homolog subunit 4 (Arabidopsis)

COP9 constitutive photomorphogenic homolog subunit 8 (Arabidopsis)

Cellular repressor of E1A-stimulated genes 1

CREBBP/EP300 inhibitor 1

CREBBP/EP300 inhibitor 1

Cisplatin resistance-associated overexpressed protein

Cofactor required for Sp1 transcriptional activation, subunit 2, 150kDa

Cofactor required for Sp1 transcriptional activation, subunit 2, 150kDa

Cofactor required for Sp1 transcriptional activation, subunit 9, 33kDa

Crystallin, zeta (quinone reductase)-like 1

CSE1 chromosome segregation 1-like (yeast)

Chondroitin sulfate proteoglycan 6 (bamacan)

CCCTC-binding factor (zinc finger protein)

Catenin (cadherin-associated protein), alpha 1, 102kDa

Catenin (cadherin-associated protein), alpha 1, 102kDa

Catenin (cadherin-associated protein), alpha 1, 102kDa

Cullin 2

Cullin 4A

Cullin 4B

Cullin 4B  
Cullin 5  
DAZ associated protein 2  
DCP2 decapping enzyme homolog (*S. cerevisiae*)  
Dynactin 4 (p62)  
DEAD (Asp-Glu-Ala-Asp) box polypeptide 1  
DEAD (Asp-Glu-Ala-Asp) box polypeptide 46  
DEK oncogene (DNA binding)  
2-deoxyribose-5-phosphate aldolase homolog (*C. elegans*)  
DEAH (Asp-Glu-Ala-His) box polypeptide 29  
Hypothetical protein DJ971N18.2  
Chromosome 1 open reading frame 77  
Hypothetical protein DKFZp564O0523  
Discs, large homolog 1 (*Drosophila*)  
D4, zinc and double PHD fingers family 2  
Dolichyl-phosphate mannosyltransferase polypeptide 1, catalytic subunit  
Embryonic ectoderm development  
Engulfment and cell motility 2 (*ced-12* homolog, *C. elegans*)  
Engulfment and cell motility 2 (*ced-12* homolog, *C. elegans*)  
Enthoprotin

Excision repair cross-complementing rodent repair deficiency, complementation group 3 (xeroderma pigmentosum group B complementing)

SEC3-like 1 (*S. cerevisiae*)  
Family with sequence similarity 61, member A  
Family with sequence similarity 61, member A  
F-box and leucine-rich repeat protein 5  
F-box protein 11  
F-box protein 28  
F-box protein 3  
F-box and WD-40 domain protein 11  
F-box and WD-40 domain protein 2  
Fem-1 homolog b (*C. elegans*)  
Fem-1 homolog b (*C. elegans*)  
Fem-1 homolog c (*C. elegans*)  
Similar to splicing factor, arginine/serine-rich 4  
Hypothetical protein FLJ11200

FLJ12716 protein  
Hypothetical protein FLJ13910  
Hypothetical protein FLJ20125  
FLJ20160 protein  
Hypothetical protein FLJ22104  
Hypothetical protein FLJ38348  
Fragile X mental retardation 1  
Fragile X mental retardation 1  
Fatso  
Fused toes homolog (mouse)  
FUS interacting protein (serine/arginine-rich) 1  
Glucan (1,4-alpha-), branching enzyme 1 (glycogen branching enzyme, Andersen disease, glycogen storage disease type IV)  
Guanosine monophosphate reductase 2  
Guanine nucleotide binding protein (G protein), q polypeptide  
Glutamate receptor, ionotropic, N-methyl D-aspartate-like 1A  
Glutamate receptor, ionotropic, N-methyl D-aspartate-like 1A  
General transcription factor IIH, polypeptide 5  
General transcription factor IIIC, polypeptide 3, 102kDa  
Glycogenin  
H2A histone family, member V  
H2A histone family, member V  
  
HESB like domain containing 2  
HDCMA18P protein  
D15F37 gene  
3-hydroxyisobutyryl-Coenzyme A hydrolase  
Homeodomain interacting protein kinase 1  
HIRA interacting protein 5  
High-mobility group 20A  
High mobility group nucleosomal binding domain 4  
Histamine N-methyltransferase  
Heterogeneous nuclear ribonucleoprotein A3  
  
Heterogeneous nuclear ribonucleoprotein H3 (2H9)  
Hydroxysteroid dehydrogenase like 2

Uncharacterized hypothalamus protein HT007  
HIV TAT specific factor 1  
Insulin-degrading enzyme  
Iduronate 2-sulfatase (Hunter syndrome)  
Inhibitor of kappa light polypeptide gene enhancer in B-cells, kinase complex-associated protein  
Insulin induced gene 2  
IQ motif and WD repeats 1  
Intersectin 2  
Jumonji domain containing 1B  
Jumonji domain containing 1B  
KIAA0280 protein  
KIAA0355  
KIAA0368  
KIAA0372  
KIAA0372  
Prolyl endopeptidase-like  
KIAA0494 gene product  
KIAA0853  
KIAA1102 protein  
KIAA1109  
KIAA1219 protein  
KIAA1279  
Kinase D-interacting substance of 220 kDa  
Kinesin-associated protein 3  
Kelch domain containing 2  
KRIT1, ankyrin repeat containing  
Kinectin 1 (kinesin receptor)  
LanC lantibiotic synthetase component C-like 1 (bacterial)  
Lysosomal-associated protein transmembrane 4 alpha  
Leptin receptor  
Likely ortholog of mouse immediate early response, erythropoietin 4  
Limkain b1  
LMBR1 domain containing 1  
Hypothetical protein LOC51315  
Homo sapiens transposon-derived Buster3 transposase-like (LOC63920), mRNA.



Hypothetical protein BC017169  
Hypothetical protein LOC92482  
Glycine-rich protein (GRP3S)  
Mitogen-activated protein kinase kinase kinase 7 interacting protein 2  
Mitogen-activated protein kinase kinase kinase kinase 3  
Mitogen-activated protein kinase kinase kinase kinase 5  
Mitogen-activated protein kinase 9  
Matrin 3  
Matrin 3  
Matrin 3  
Methyl-CpG binding domain protein 4  
Methyl-CpG binding domain protein 4  
Hypothetical protein MDS025  
Methyl CpG binding protein 2 (Rett syndrome)  
Mediator of RNA polymerase II transcription, subunit 4 homolog (yeast)  
Methyltransferase like 5  
Hypothetical protein MGC23401  
McKusick-Kaufman syndrome  
MKL/myocardin-like 2  
MutL homolog 1, colon cancer, nonpolyposis type 2 (E. coli)  
Molybdenum cofactor synthesis 2  
Mortality factor 4  
Mortality factor 4 like 1  
Morf4 family associated protein 1-like 1  
MRS2-like, magnesium homeostasis factor (S. cerevisiae)  
Mitochondrial translation optimization 1 homolog (S. cerevisiae)  
NGFI-A binding protein 1 (EGR1 binding protein 1)  
Nucleosome assembly protein 1-like 2  
Neighbor of BRCA1 gene 1  
NCK-associated protein 1  
Nuclear receptor coactivator 1  
Nuclear receptor coactivator 1  
Nuclear receptor coactivator 6  
Nuclear receptor co-repressor 1  
Nuclear receptor co-repressor 1

Nedd4 family interacting protein 1  
Nuclear domain 10 protein  
NADH dehydrogenase (ubiquinone) 1 beta subcomplex, 6, 17kDa  
NIMA (never in mitosis gene a)-related kinase 7  
Neurofibromin 1 (neurofibromatosis, von Recklinghausen disease, Watson disease)  
Nuclear transcription factor Y, beta  
Nuclear transcription factor Y, beta  
Nuclear transcription factor Y, gamma  
synonyms: FLJ20147, FLJ25621, FLJ33312, MGC45492, DKFZp779F115; 1200003G01Rik;  
NifU-like N-terminal domain containing  
Nicotinamide nucleotide transhydrogenase  
Nicotinamide nucleotide transhydrogenase  
Nucleolar protein 7, 27kDa  
Nucleolar protein 7, 27kDa  
Aminopeptidase puromycin sensitive  
NSFL1 (p97) cofactor (p47)  
Nudix (nucleoside diphosphate linked moiety X)-type motif 21  
Numb homolog (Drosophila)  
Nucleoporin 133kDa  
Origin recognition complex, subunit 4-like (yeast)  
Oxysterol binding protein-like 1A  
Oxysterol binding protein-like 8  
Osmosis responsive factor  
Osteopetrosis associated transmembrane protein 1  
Hypothetical protein FLJ10656  
Proliferation-associated 2G4, 38kDa  
Platelet-activating factor acetylhydrolase, isoform Ib, alpha subunit 45kDa  
Poly(A) binding protein interacting protein 1  
Poly(A) binding protein interacting protein 1  
Poly(A) binding protein interacting protein 1  
Solute carrier family 2 (facilitated glucose transporter), member 3 pseudogene 1  
Propionyl Coenzyme A carboxylase, beta polypeptide  
Protein-L-isoaspartate (D-aspartate) O-methyltransferase  
Protein-L-isoaspartate (D-aspartate) O-methyltransferase  
Chromosome 20 open reading frame 36

PEST-containing nuclear protein  
Phosducin-like 3  
Pyruvate dehydrogenase (lipoamide) beta  
Peroxisomal biogenesis factor 11B  
Peroxisomal biogenesis factor 19  
Peroxisomal biogenesis factor 3  
PHD finger protein 3  
PHD finger protein 3  
Phosphorylase kinase, beta  
Phosphorylase kinase, beta  
Translokin  
Translokin  
Praja 2, RING-H2 motif containing  
Protein kinase N2  
Plakophilin 4  
Plakophilin 4  
Paraoxonase 2  
Protein phosphatase 1, regulatory (inhibitor) subunit 2  
Protein phosphatase 1, regulatory subunit 3D  
Protein phosphatase 2, regulatory subunit B (B56), gamma isoform  
Peptidylprolyl isomerase domain and WD repeat containing 1  
Preimplantation protein 3

Solute carrier family 3 (cystine, dibasic and neutral amino acid transporters, activator of cystine, dibasic and neutral amino acid transport), member 1

Protein kinase, cAMP-dependent, regulatory, type I, alpha (tissue specific extinguisher 1)  
Protein kinase, cAMP-dependent, regulatory, type I, alpha (tissue specific extinguisher 1)  
Protein kinase, cAMP-dependent, regulatory, type I, alpha (tissue specific extinguisher 1)  
Protein kinase D1  
Protein kinase D3  
Protein kinase, interferon-inducible double stranded RNA dependent activator  
PRP38 pre-mRNA processing factor 38 (yeast) domain containing B  
Proteasome (prosome, macropain) 26S subunit, ATPase, 6  
Proteasome (prosome, macropain) 26S subunit, non-ATPase, 12  
Proteasome (prosome, macropain) inhibitor subunit 1 (PI31)  
PTK9 protein tyrosine kinase 9  
Protein tyrosine phosphatase, non-receptor type 11 (Noonan syndrome 1)

Pumilio homolog 2 (Drosophila)

Purine-rich element binding protein A

RAB14, member RAS oncogene family

RAB1A, member RAS oncogene family

RAB2, member RAS oncogene family

RAB21, member RAS oncogene family

RAB22A, member RAS oncogene family

RAB23, member RAS oncogene family

RAB28, member RAS oncogene family

RAB40B, member RAS oncogene family

RAB4A, member RAS oncogene family

RAB4A, member RAS oncogene family

RAB6C, member RAS oncogene family

RAB7, member RAS oncogene family

RAB GTPase activating protein 1

V-raf-1 murine leukemia viral oncogene homolog 1

V-ral simian leukemia viral oncogene homolog B (ras related; GTP binding protein)

RAS p21 protein activator (GTPase activating protein) 1

RAS p21 protein activator (GTPase activating protein) 1

**Retinoblastoma 1 (including osteosarcoma)**

RNA binding motif protein 16

RNA binding motif protein 22

RNA binding motif protein 34

Recombining binding protein suppressor of hairless (Drosophila)

REST corepressor 3

Retinol dehydrogenase 14 (all-trans and 9-cis)

Radixin

REV1-like (yeast)

RIO kinase 3 (yeast)

Ring finger protein 130

Ring finger protein 14

Ring finger protein 14

Ring finger protein 146

Ring finger protein 38

Rho-associated, coiled-coil containing protein kinase 1  
Replication protein A1, 70kDa  
Replication protein A1, 70kDa  
Round spermatid basic protein 1  
RW1 protein  
RWD domain containing 3  
RYK receptor-like tyrosine kinase  
TFIIA-alpha/beta-like factor  
Sec1 family domain containing 1  
Serologically defined colon cancer antigen 1  
Stromal cell derived factor receptor 1  
Succinate dehydrogenase complex, subunit D, integral membrane protein  
SEC23 interacting protein  
SEC24 related gene family, member B (*S. cerevisiae*)  
SEC63-like (*S. cerevisiae*)  
SUMO1/sentrin specific protease 6  
SUMO1/sentrin specific protease 6  
Selenophosphate synthetase 1  
Tumor differentially expressed 2  
Tumor differentially expressed 1  
SH2 domain binding protein 1 (tetratricopeptide repeat containing)  
Soc-2 suppressor of clear homolog (*C. elegans*)  
S-phase kinase-associated protein 1A (p19A)  
S-phase kinase-associated protein 1A (p19A)  
Solute carrier family 25 (mitochondrial carrier, Aralar), member 12  
Solute carrier family 30 (zinc transporter), member 5  
Solute carrier family 35, member A5  
STE20-like kinase (yeast)  
Modulator of estrogen induced transcription  
SMAD, mothers against DPP homolog 2 (*Drosophila*)  
SMAD, mothers against DPP homolog 2 (*Drosophila*)  
SMAD, mothers against DPP homolog 4 (*Drosophila*)  
Small acidic protein  
Small acidic protein  
Stromal membrane-associated protein 1

SWI/SNF related, matrix associated, actin dependent regulator of chromatin, subfamily a, member 2

SWI/SNF related, matrix associated, actin dependent regulator of chromatin, subfamily a, member 2

SWI/SNF related, matrix associated, actin dependent regulator of chromatin, subfamily a, member 2

SWI/SNF related, matrix associated, actin dependent regulator of chromatin, subfamily a, member 2

SWI/SNF related, matrix associated, actin dependent regulator of chromatin, subfamily a, member 3

SWI/SNF related, matrix associated, actin dependent regulator of chromatin, subfamily a, member 5

SWI/SNF related, matrix associated, actin dependent regulator of chromatin, subfamily a, member 5

SWI/SNF related, matrix associated, actin dependent regulator of chromatin, subfamily a, member 5

SMC1 structural maintenance of chromosomes 1-like 1 (yeast)

SMC5 structural maintenance of chromosomes 5-like 1 (yeast)

Sorting nexin 2

Sorting nexin 2

Sorting nexin 5

Suppressor of cytokine signaling 6

SON DNA binding protein

Sp3 transcription factor

S-phase response (cyclin-related)

Serine palmitoyltransferase, long chain base subunit 1

U2-associated SR140 protein

U2-associated SR140 protein

U2-associated SR140 protein

Sorcin

Signal recognition particle 14kDa (homologous Alu RNA binding protein)

Signal recognition particle 9kDa

Synovial sarcoma translocation, chromosome 18

TROVE domain family, member 2

Sjogren syndrome antigen B (autoantigen La)

Suppression of tumorigenicity 13 (colon carcinoma) (Hsp70 interacting protein)

Signal transducing adaptor molecule (SH3 domain and ITAM motif) 2

Syntaxin 7

Syntaxin 7

Syntaxin binding protein 3

Succinate-CoA ligase, ADP-forming, beta subunit

Succinate-CoA ligase, GDP-forming, alpha subunit  
Succinate-CoA ligase, GDP-forming, beta subunit  
Succinate-CoA ligase, GDP-forming, beta subunit  
SMT3 suppressor of mif two 3 homolog 1 (yeast)  
SMT3 suppressor of mif two 3 homolog 1 (yeast)  
SRB7 suppressor of RNA polymerase B homolog (yeast)  
TAF7 RNA polymerase II, TATA box binding protein (TBP)-associated factor, 55kDa  
TAF9-like RNA polymerase II, TATA box binding protein (TBP)-associated factor, 31kDa  
TRAF family member-associated NFKB activator  
Transcription factor CP2  
Trans-golgi network protein 2  
Tousled-like kinase 1  
Translocation protein 1  
Transmembrane trafficking protein  
Transmembrane emp24 protein transport domain containing 7  
Transmembrane protein 14A  
Transmembrane protein 14B  
Transmembrane protein 59  
Hypothetical protein LOC283232  
Tumor necrosis factor superfamily, member 5-induced protein 1  
Transportin 1  
Torsin A interacting protein 1  
Torsin A interacting protein 1  
Trafficking protein particle complex 4  
Thyroid hormone receptor interactor 12  
Thyroid hormone receptor interactor 4  
Translin  
Translin-associated factor X  
TRAF and TNF receptor associated protein  
Tubulin, gamma complex associated protein 3  
Twisted gastrulation homolog 1 (Drosophila)  
Ubiquitin-activating enzyme E1C (UBA3 homolog, yeast)  
Ubiquitin-conjugating enzyme E2A (RAD6 homolog)  
Ubiquitin-conjugating enzyme E2G 1 (UBC7 homolog, C. elegans)  
Ubiquitin-like 3

Ubiquilin 2  
Ubiquitin protein ligase E3 component n-recogin 2  
Unc-50 homolog (C. elegans)  
UPF2 regulator of nonsense transcripts homolog (yeast)  
UPF3 regulator of nonsense transcripts homolog A (yeast)  
UPF3 regulator of nonsense transcripts homolog A (yeast)  
UPF3 regulator of nonsense transcripts homolog B (yeast)  
Ubiquinol-cytochrome c reductase core protein II  
Ubiquinol-cytochrome c reductase core protein II  
Ubiquitin specific protease 1  
Ubiquitin specific protease 9, X-linked (fat facets-like, Drosophila)  
Ubiquitin specific protease 9, Y-linked (fat facets-like, Drosophila)  
UTP14, U3 small nucleolar ribonucleoprotein, homolog C (yeast)  
UV radiation resistance associated gene  
Von Hippel-Lindau binding protein 1  
Vacuolar protein sorting 13C (yeast)  
Vacuolar protein sorting 24 (yeast)

Vacuolar protein sorting 45A (yeast)  
WW domain containing adaptor with coiled-coil  
WD repeat and FYVE domain containing 3  
WD repeat and FYVE domain containing 3  
WD repeat domain 61  
WD repeat domain 61  
WD repeat and SOCS box-containing 1  
Xeroderma pigmentosum, complementation group A  
Exportin 1 (CRM1 homolog, yeast)

X-ray repair complementing defective repair in Chinese hamster cells 5 (double-strand-break rejoining; Ku autoantigen, 80kDa)

Yippee-like 5 (Drosophila)

YTH domain containing 2  
Zinc finger, A20 domain containing 3  
Zinc finger CCCH-type containing 7A  
Zinc finger, CCHC domain containing 10  
Zinc finger, DHHC-type containing 17



Zinc finger, DHHC-type containing 6  
HCF-binding transcription factor Zhangfei  
Zinc finger, MYND domain containing 11  
Zinc finger protein 291  
Zinc finger protein 313  
Zinc finger protein 415  
Zinc finger protein 9 (a cellular retroviral nucleic acid binding protein)

Transmembrane protein 41B
